# Supplementary material for: Selectfluor-mediated tandem cyclization of enaminones with diselenides toward the synthesis of 3-selenylated chromones
Source: Royal Society of Chemistry journal article supplement (doi:10.1039/d3ra05246j), 2023-01-01
Supplement: d3ra05246j1.pdf [file d3ra05246j1.pdf]

# Supporting Information

## Selectfluor-Mediated Tandem Cyclization of Enaminones with diselenides toward the synthesis of 3-Selenylated Chromones

Jihong Xia,<sup>a</sup> Qian Chen,<sup>b</sup> Jinwei Yuan,<sup>b,\*</sup> Weishuo Shi,<sup>b</sup> Liangru Yang,<sup>b</sup> Yongmei Xiao,<sup>b</sup>

<sup>a</sup> ENOVA Pharmaceutical Research (Nanjing) Co. Ltd., Nanjing 210033, P. R. China

<sup>b</sup> School of Chemistry & Chemical Engineering, Henan University of Technology, Zhengzhou 450001, P. R. China

**\*Corresponding authors:**

**E-mail:** [yuanjinweigs@126.com](mailto:yuanjinweigs@126.com) (Jinwei Yuan)

---

### Contents

|                                       |   |
|---------------------------------------|---|
| 1 General information.....            | 1 |
| 2 Copies of spectra of products ..... | 2 |

## 1 General information

All chemicals were commercially available and used as received without further. Column chromatography was performed using 300-400 mesh silica. Nuclear magnetic resonance spectra were recorded on Bruker Avance 400 MHz spectrometer.  $^1\text{H}$  NMR spectra are recorded in parts per million from tetramethylsilane. Data were reported as follows: chemical shift, multiplicity (s = singlet, d = doublet, t = triplet, m = multiplet and br = broad), coupling constant in Hz and integration.  $^{13}\text{C}$  NMR spectra were recorded in parts per million from tetramethylsilane.  $^{19}\text{F}$  NMR spectra were recorded in parts per million with fluorobenzene as external standard. High resolution mass spectra (HR MS) was performed using a Thermo Scientific Q Exactive Hybrid Quadrupole-Orbitrap mass spectrometer equipped with an EASY Spray nanospray source operated in positive ion mode. IR spectra were recorded on WQF-510 Fourier transform infrared spectrophotometer. Melting points were measured on an XT4A microscopic apparatus uncorrected.

## 2 Copies of spectra of products

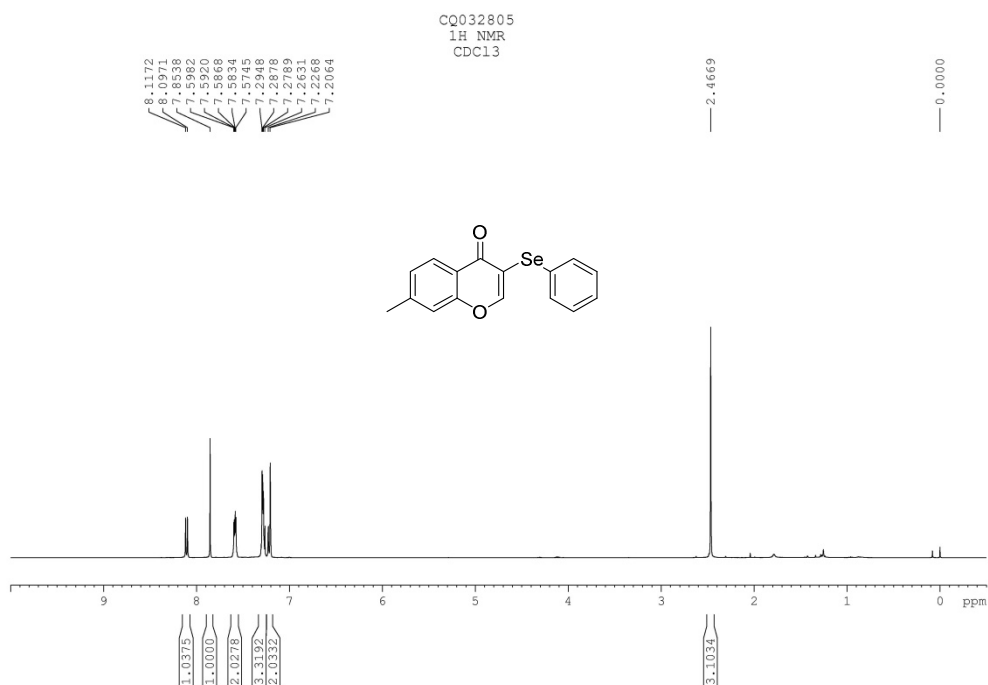

Fig. 1 <sup>1</sup>H NMR spectrum of compound 3aa

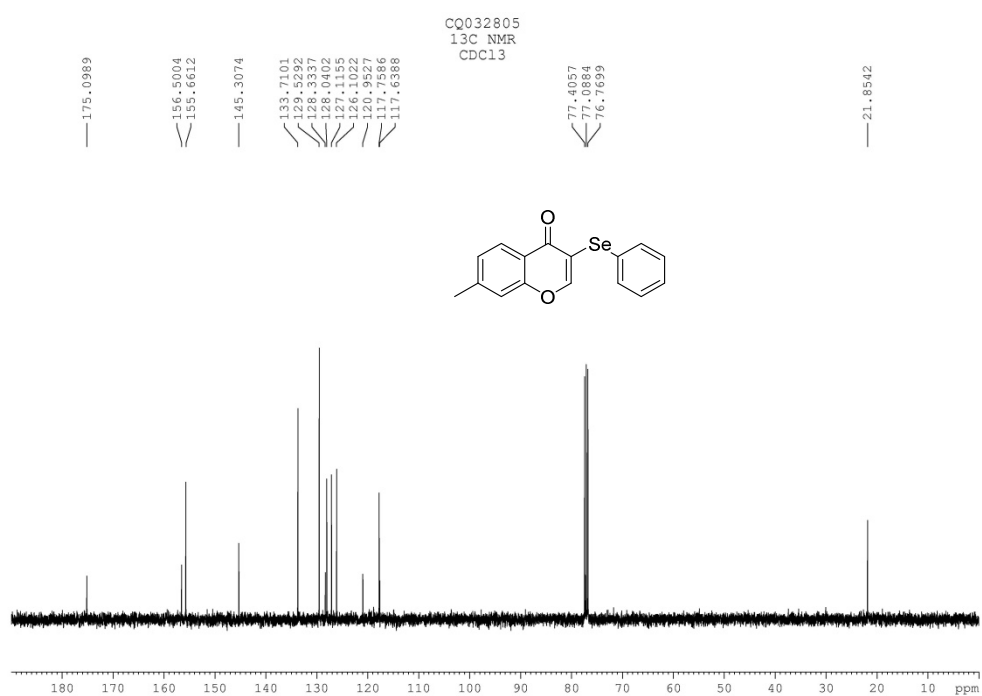

Fig. 2 <sup>13</sup>C NMR spectrum of compound 3aa

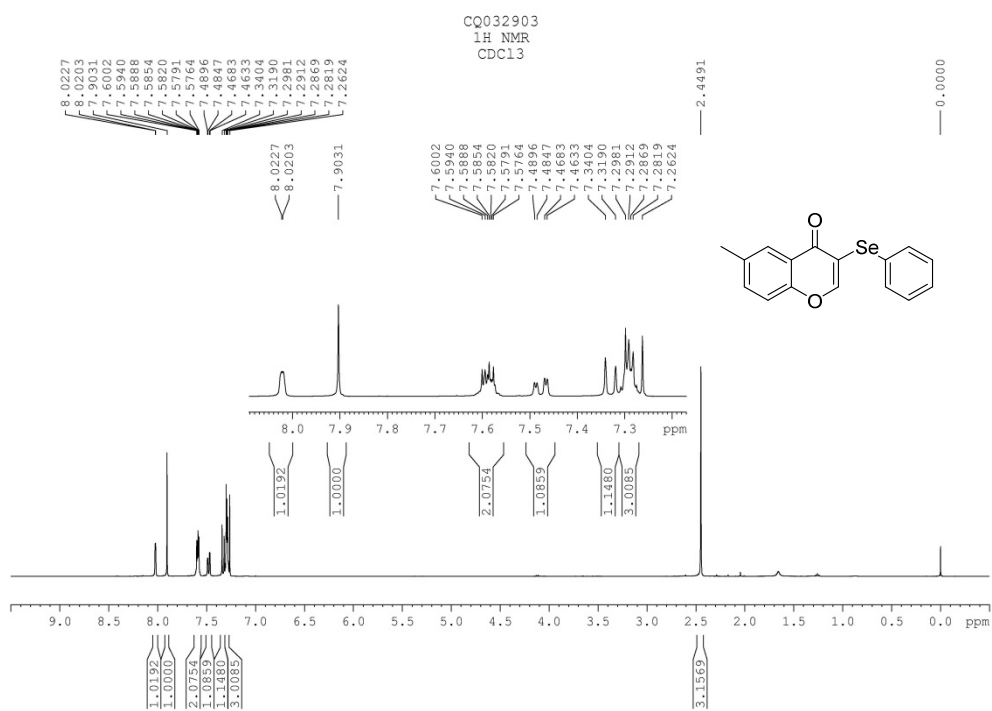

**Fig. 3**  $^1\text{H}$  NMR spectrum of compound **3ba**

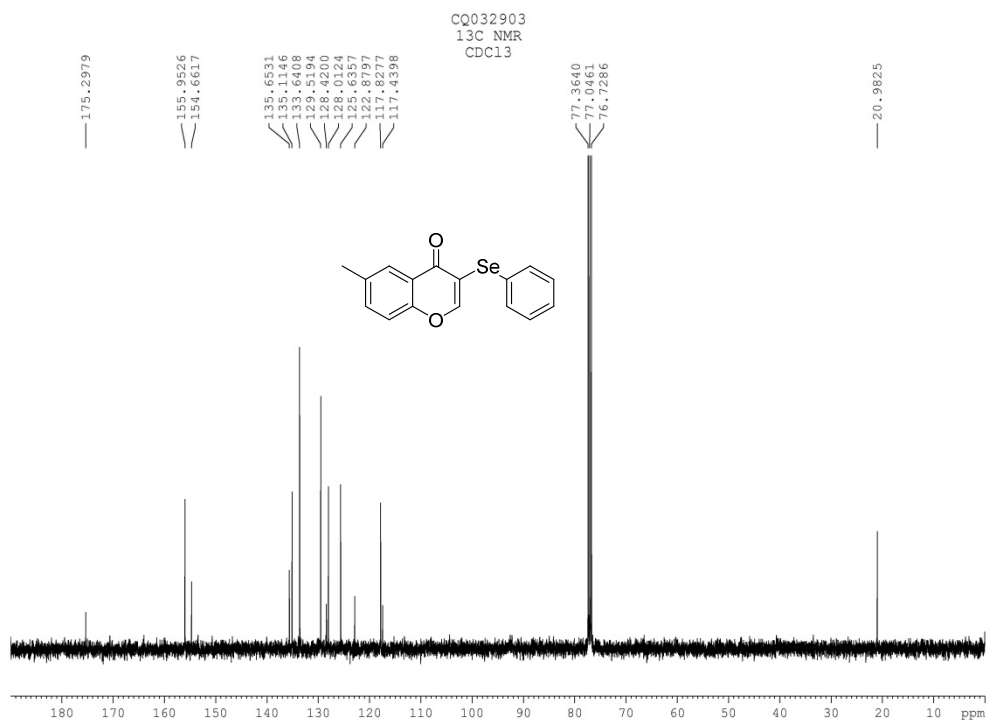

**Fig. 4**  $^{13}\text{C}$  NMR spectrum of compound **3ba**

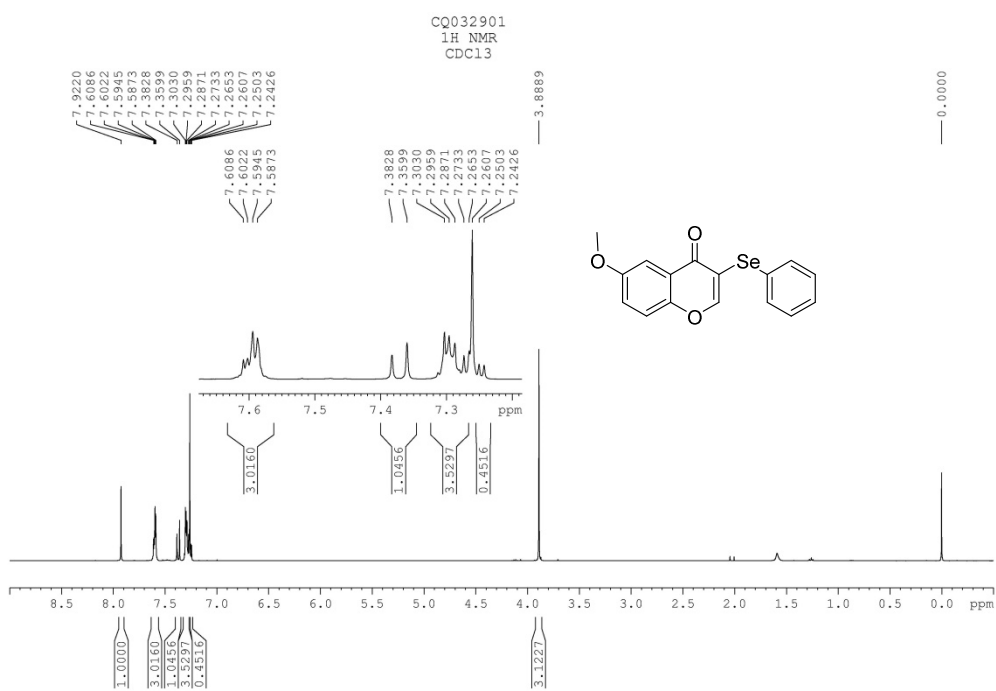

Fig. 5 <sup>1</sup>H NMR spectrum of compound 3ca

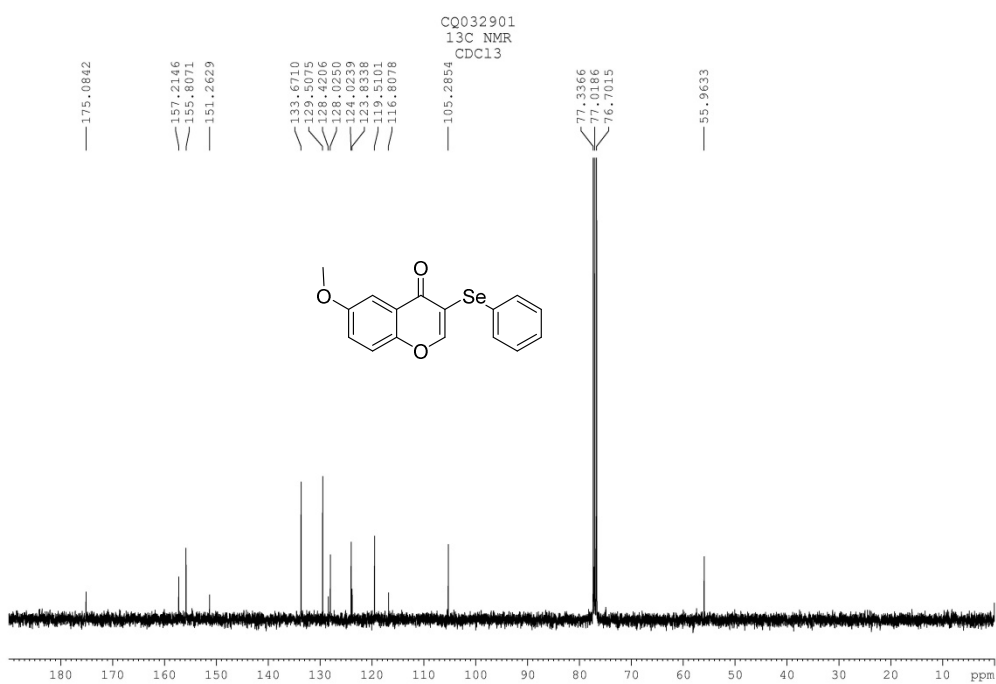

Fig. 6 <sup>13</sup>C NMR spectrum of compound 3ca

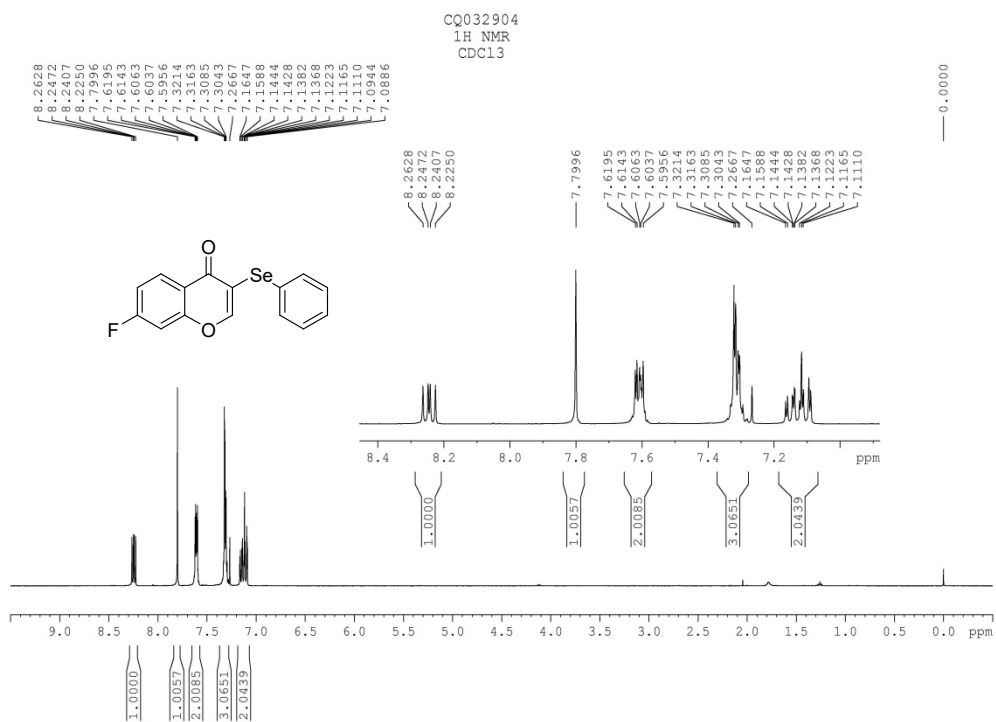

Fig. 7 <sup>1</sup>H NMR spectrum of compound 3da

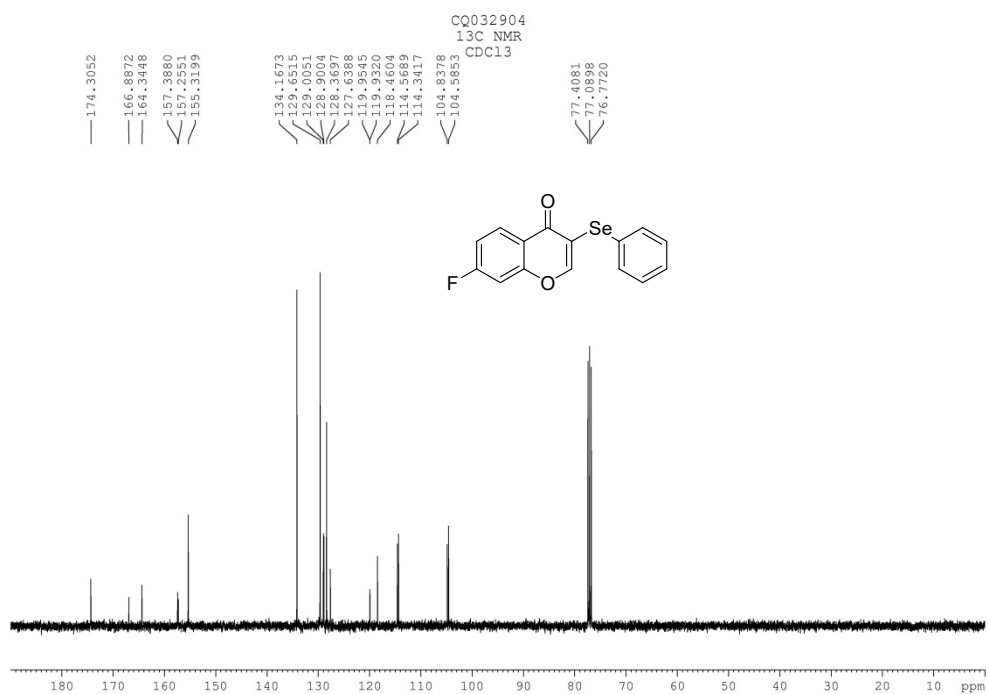

Fig. 8 <sup>13</sup>C NMR spectrum of compound 3da

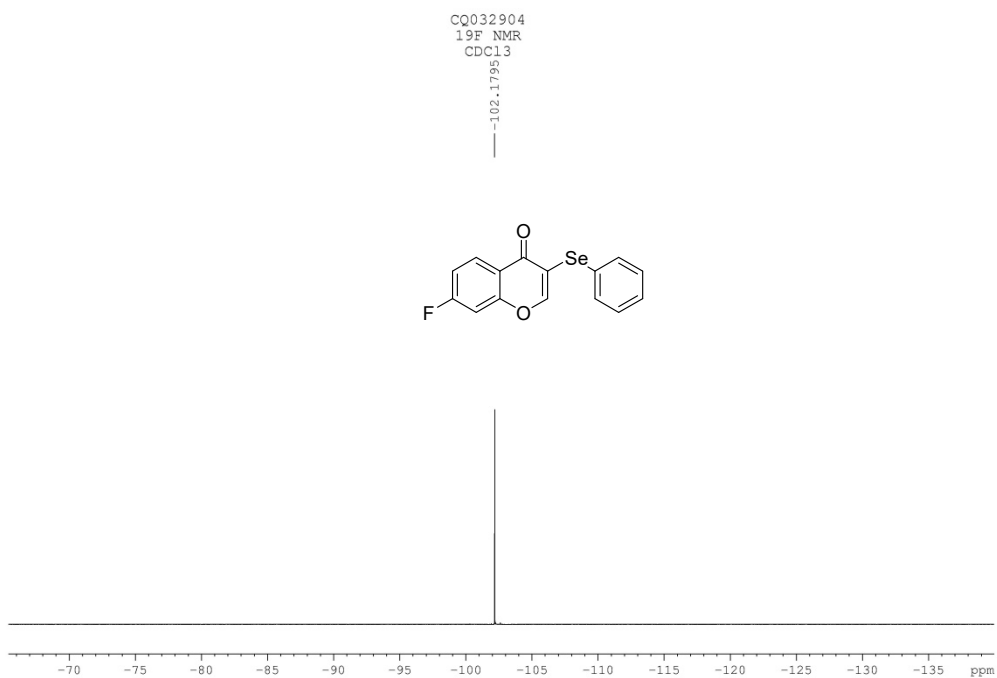

Fig. 9 <sup>19</sup>F NMR spectrum of compound 3da

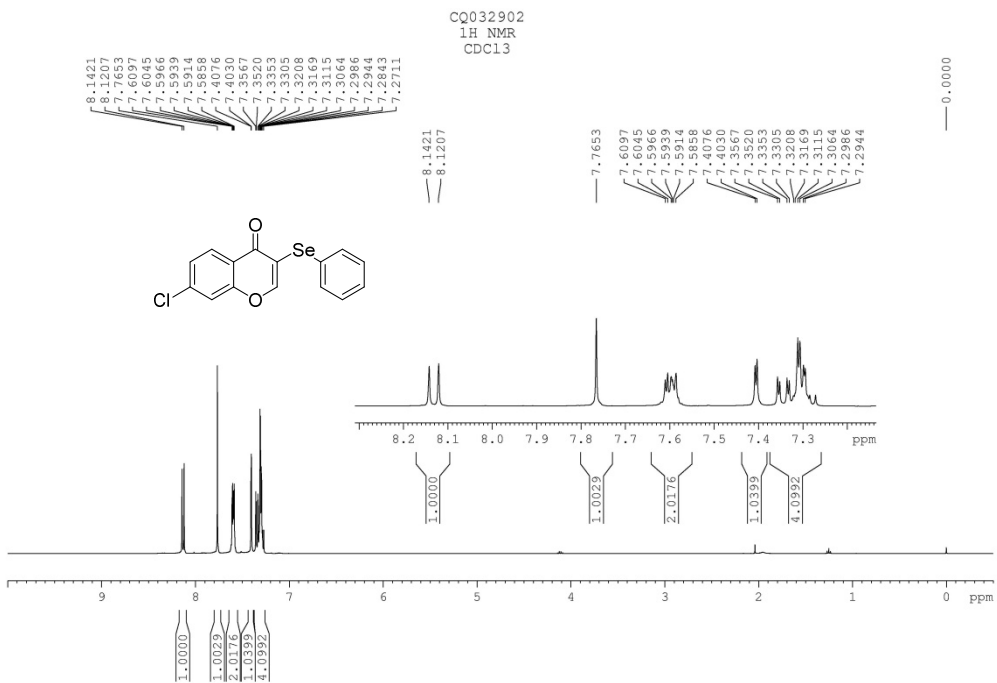

Fig. 10 <sup>1</sup>H NMR spectrum of compound 3ea

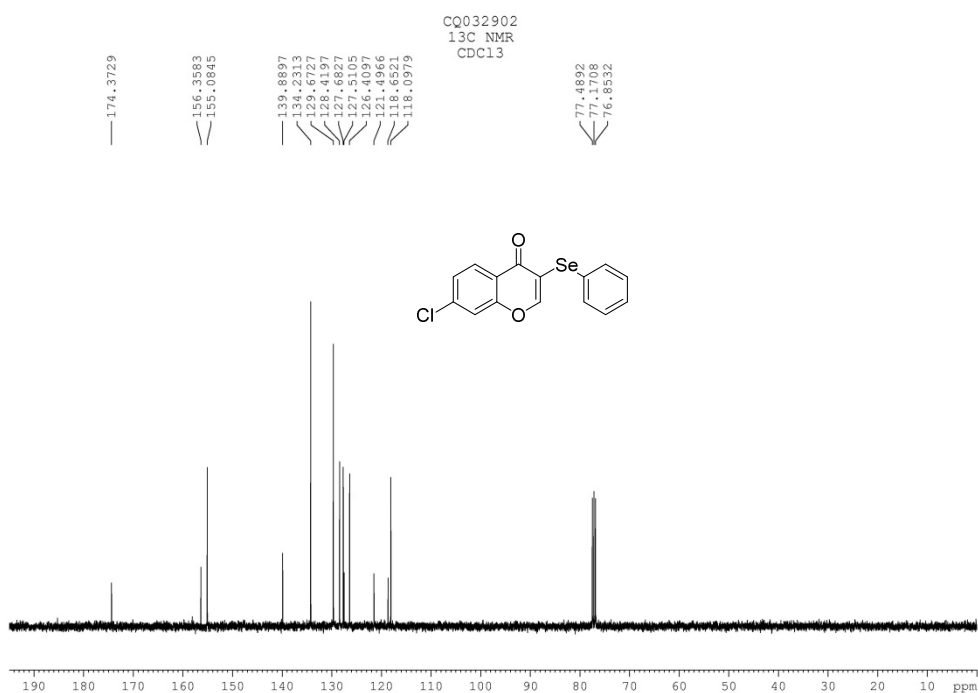

Fig. 11 <sup>13</sup>C NMR spectrum of compound 3ea

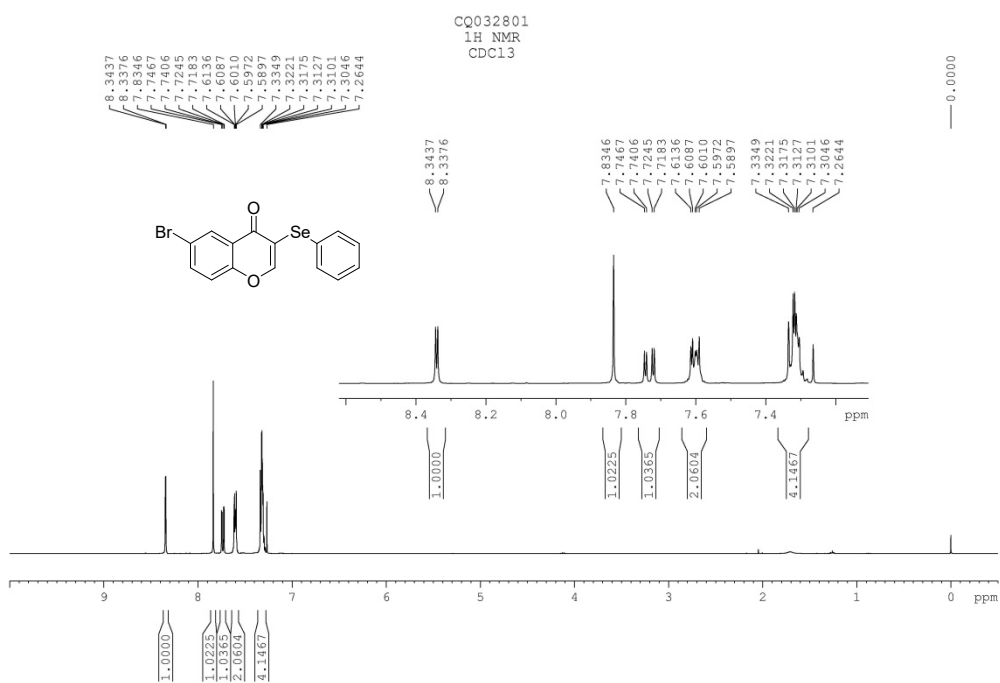

Fig. 12 <sup>1</sup>H NMR spectrum of compound 3fa



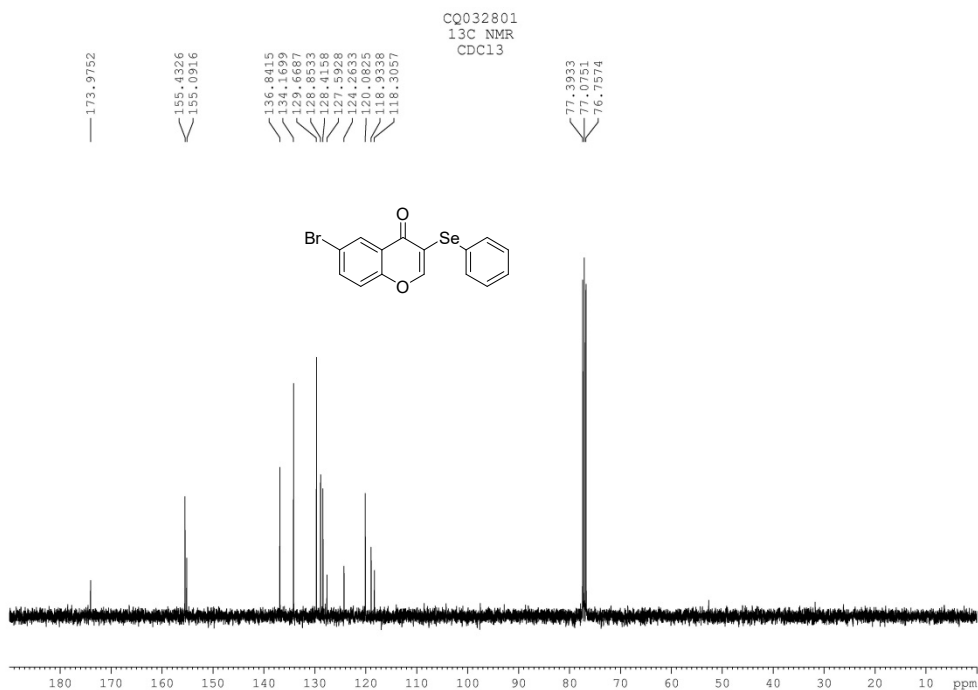

Fig. 13 <sup>13</sup>C NMR spectrum of compound 3fa

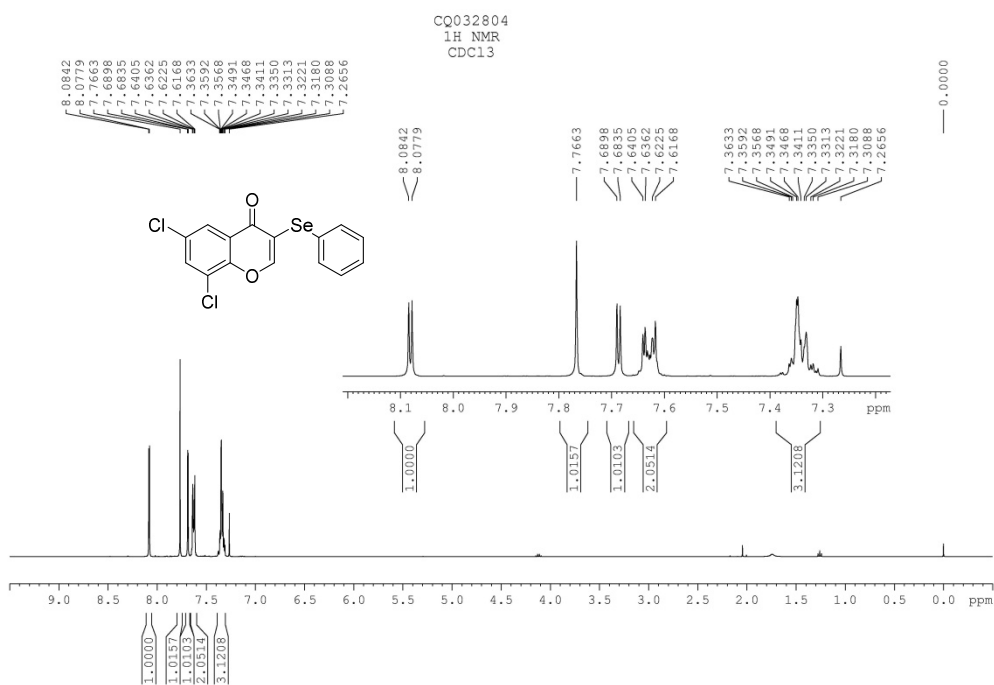

Fig. 14 <sup>1</sup>H NMR spectrum of compound 3ga

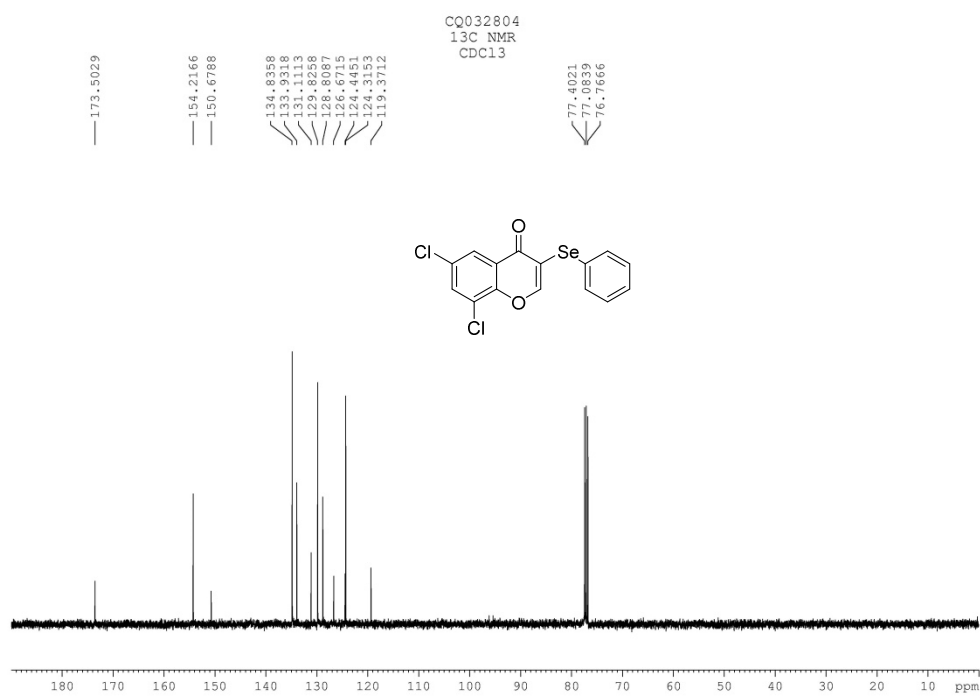

**Fig. 15**  $^{13}\text{C}$  NMR spectrum of compound **3ga**

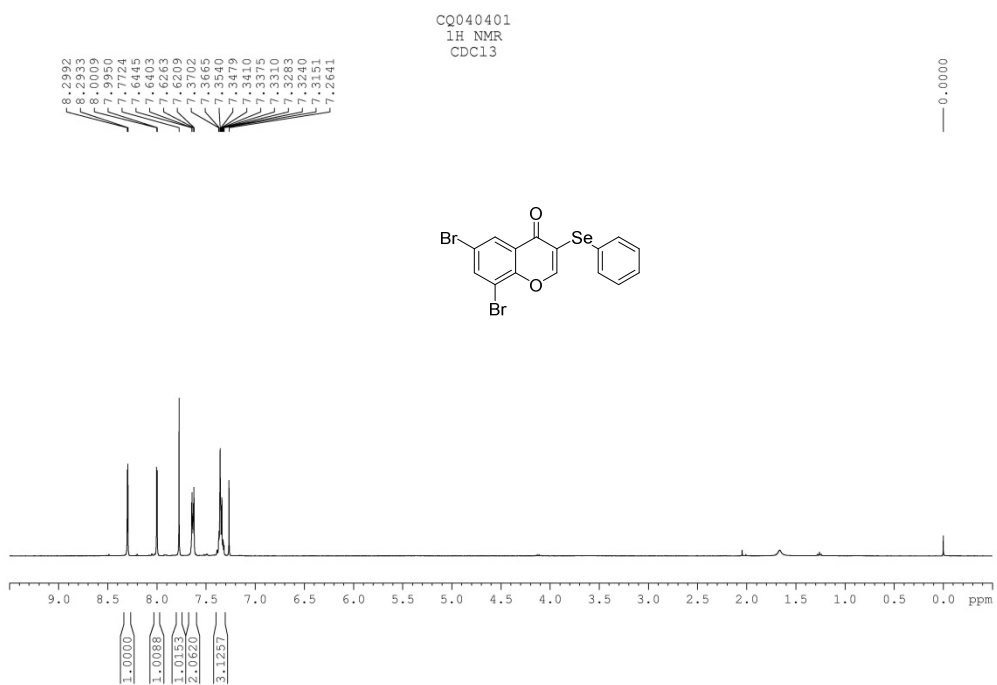

**Fig. 16**  $^1\text{H}$  NMR spectrum of compound **3ha**

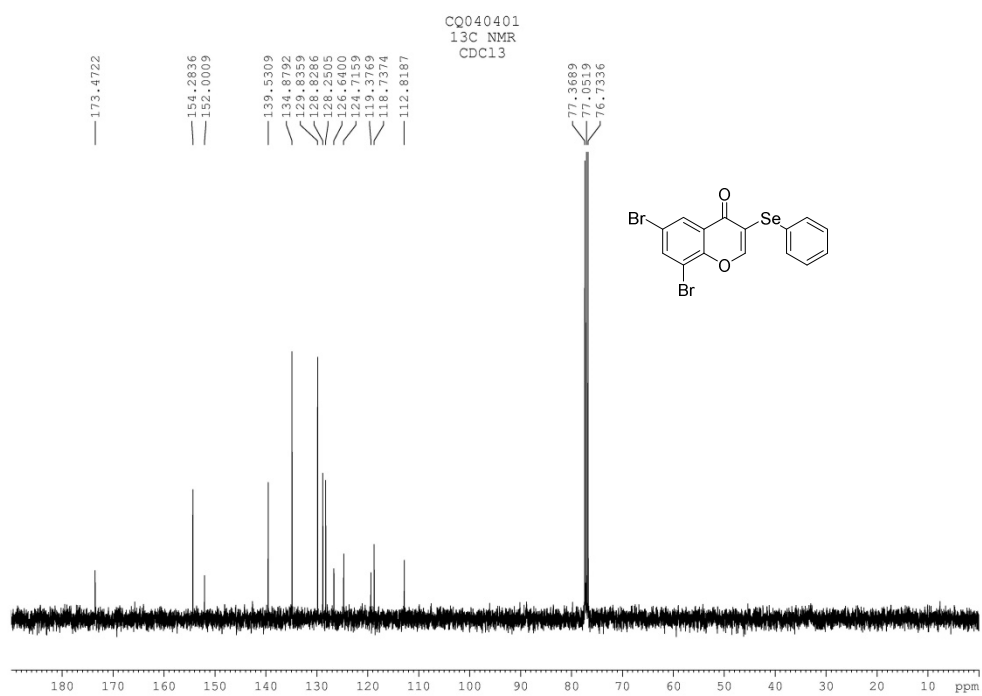

Fig. 17 <sup>13</sup>C NMR spectrum of compound 3ha

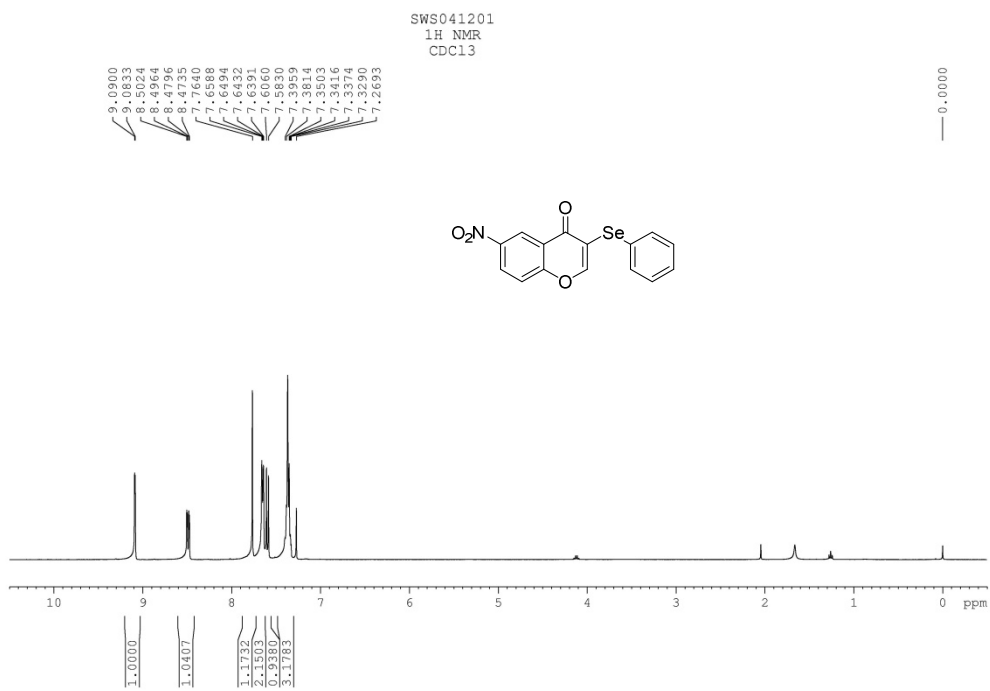

Fig. 18 <sup>1</sup>H NMR spectrum of compound 3ia

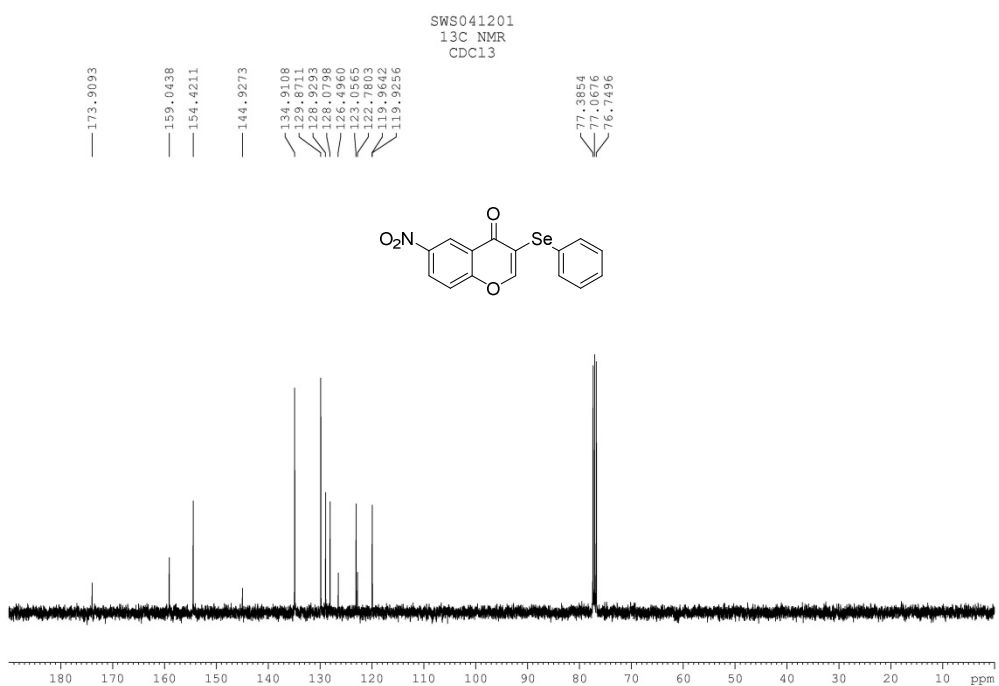

Fig. 19 <sup>13</sup>C NMR spectrum of compound 3ia

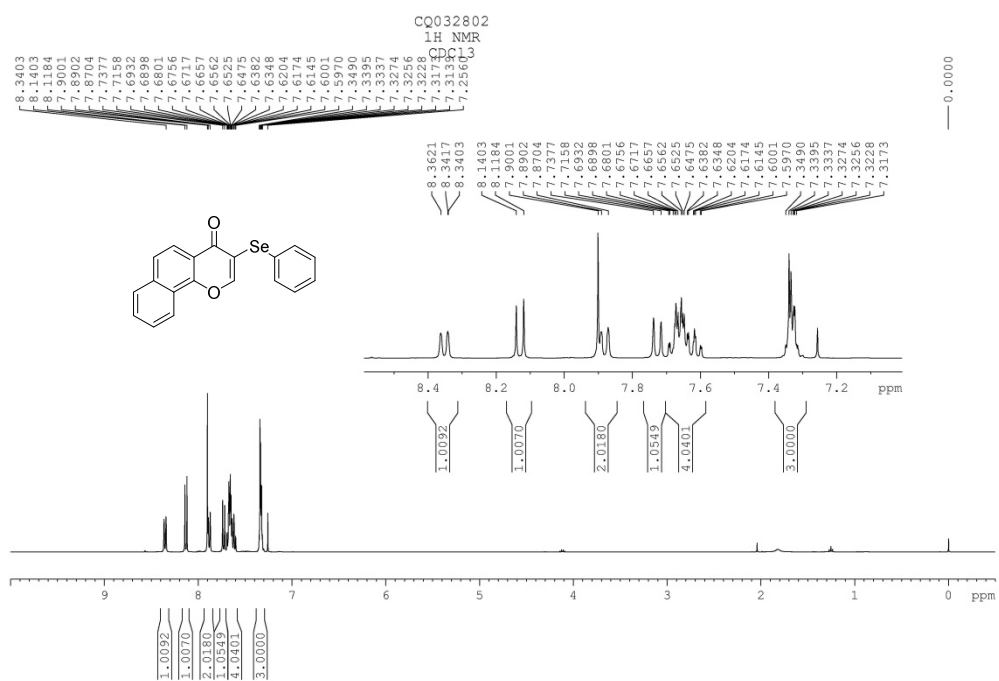

Fig. 20 <sup>1</sup>H NMR spectrum of compound 3ja

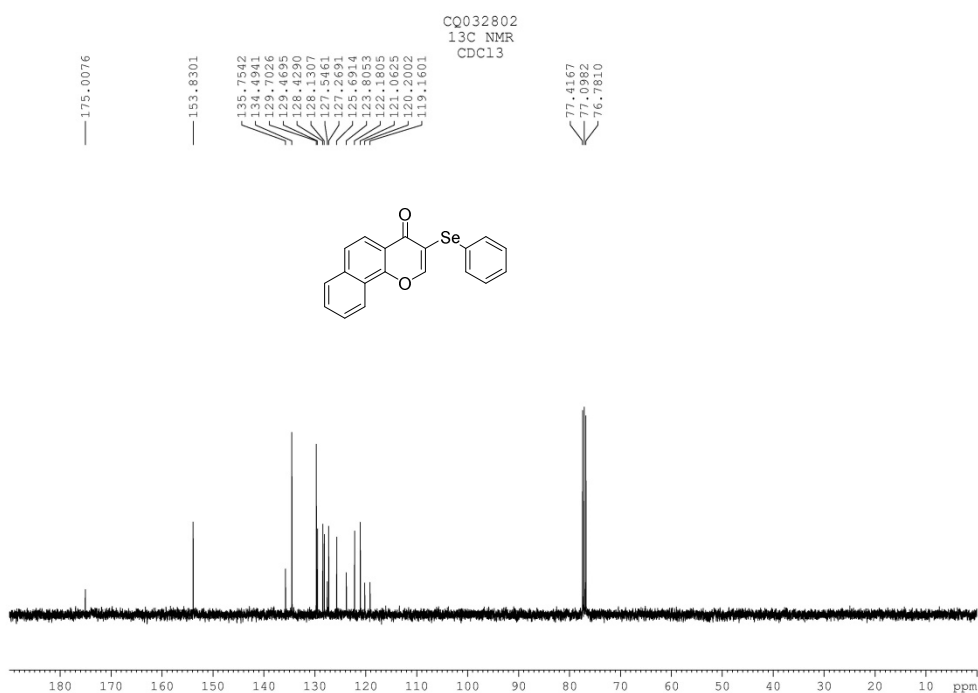

Fig. 21 <sup>13</sup>C NMR spectrum of compound 3ja

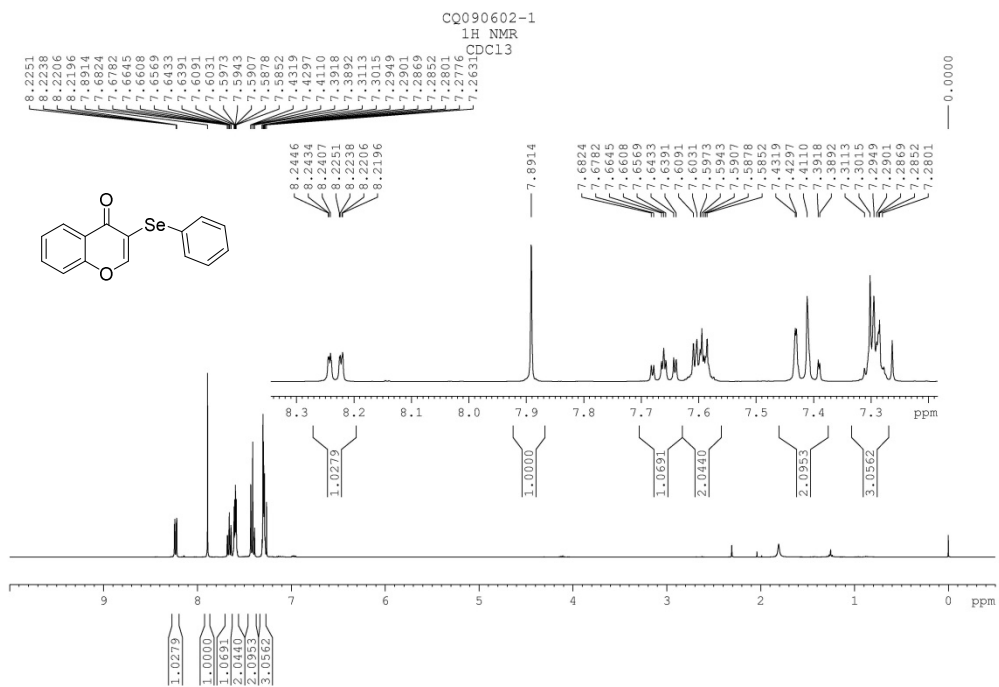

Fig. 22 <sup>1</sup>H NMR spectrum of compound 3a

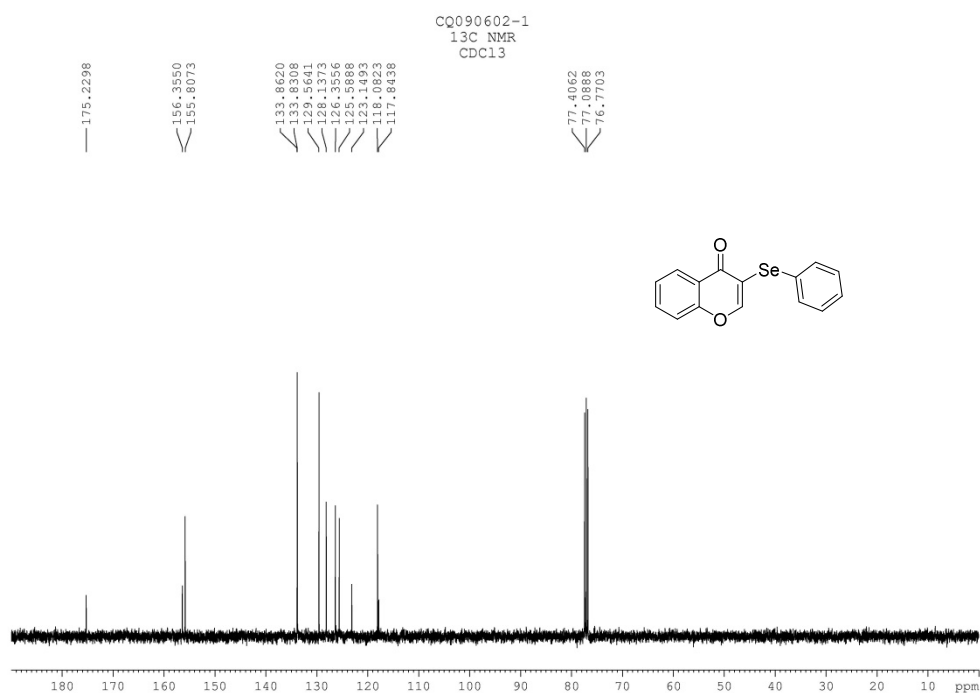

Fig. 23 <sup>13</sup>C NMR spectrum of compound 3a

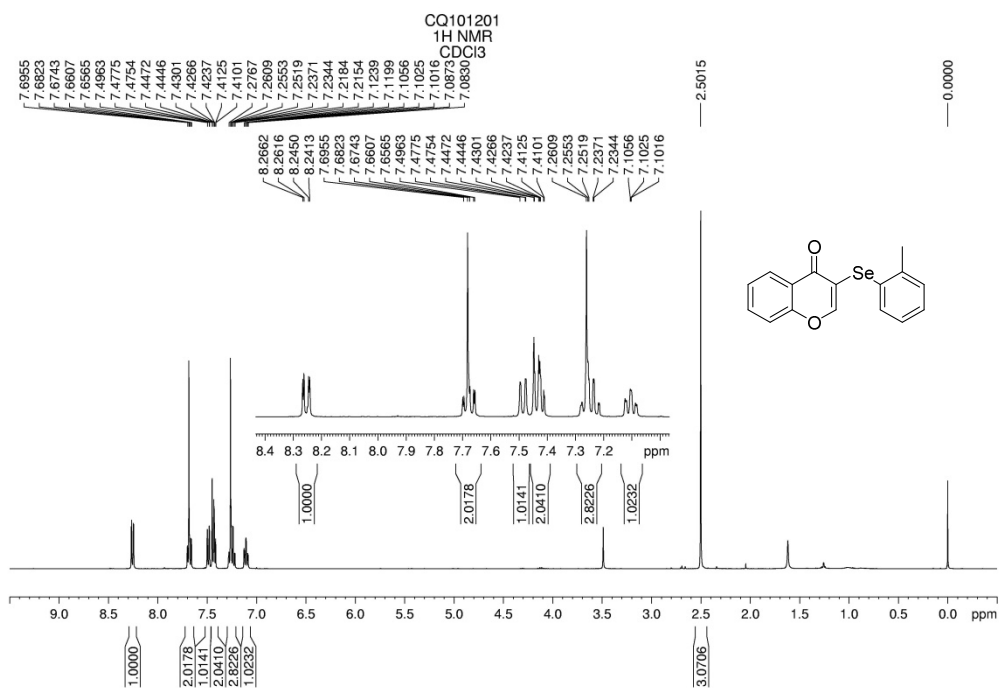

Fig. 24 <sup>1</sup>H NMR spectrum of compound 3b



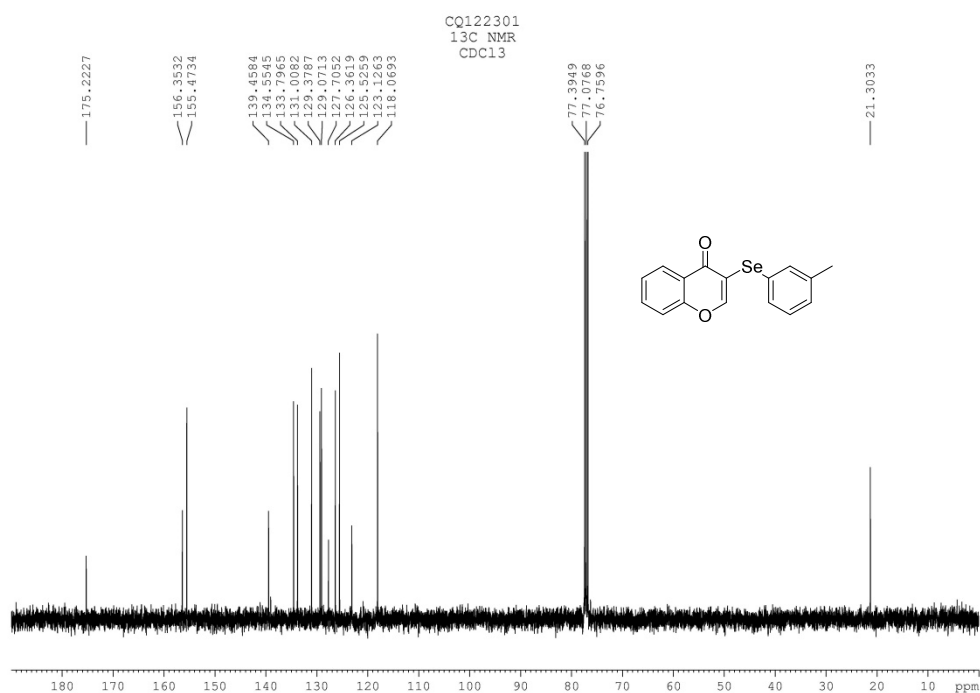

Fig. 27  $^{13}\text{C}$  NMR spectrum of compound **3c**

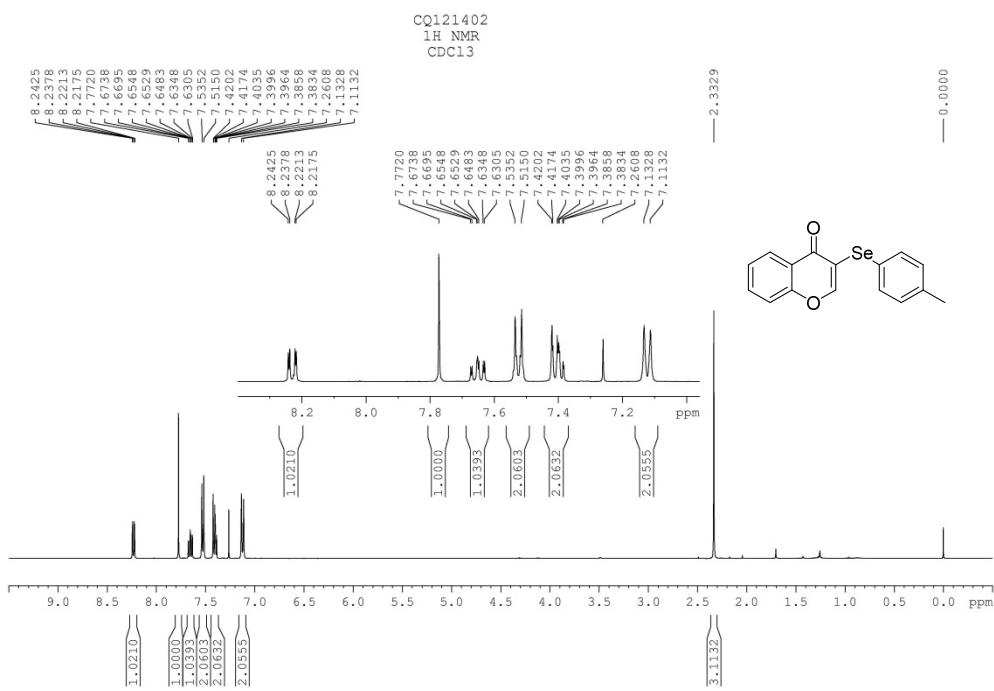

Fig. 28  $^1\text{H}$  NMR spectrum of compound **3d**



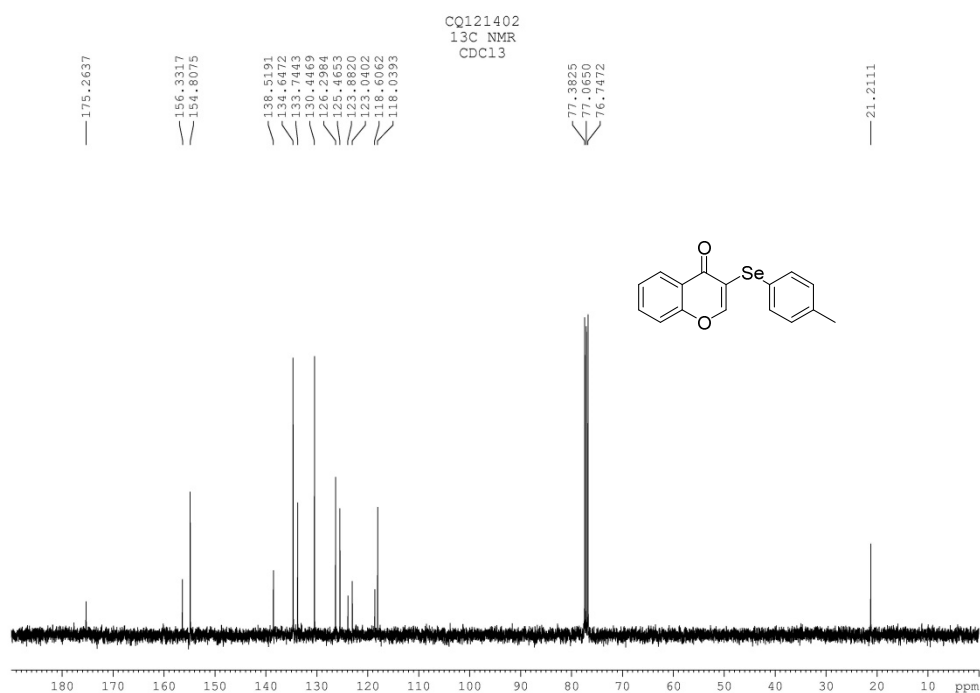

Fig. 29  $^{13}\text{C}$  NMR spectrum of compound 3d

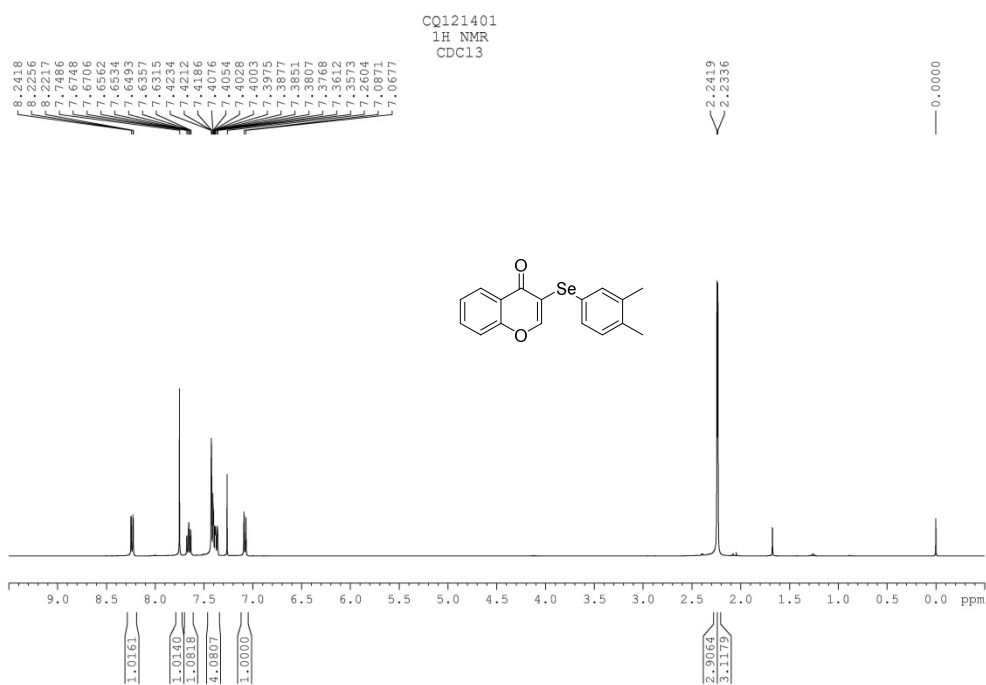

Fig. 30  $^1\text{H}$  NMR spectrum of compound 3e

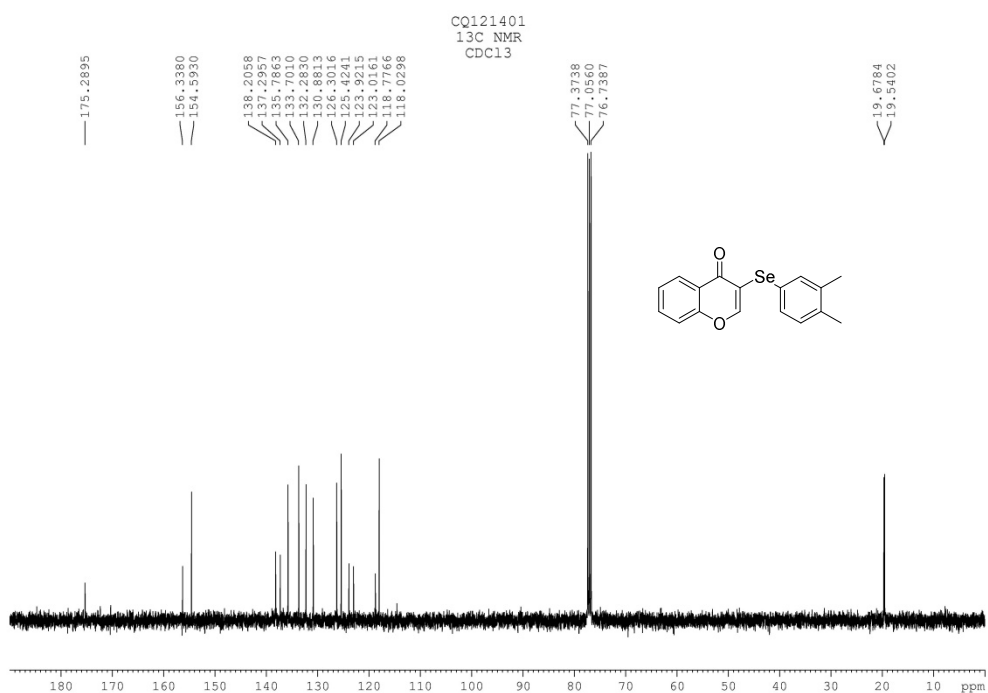

Fig. 31 <sup>13</sup>C NMR spectrum of compound 3e

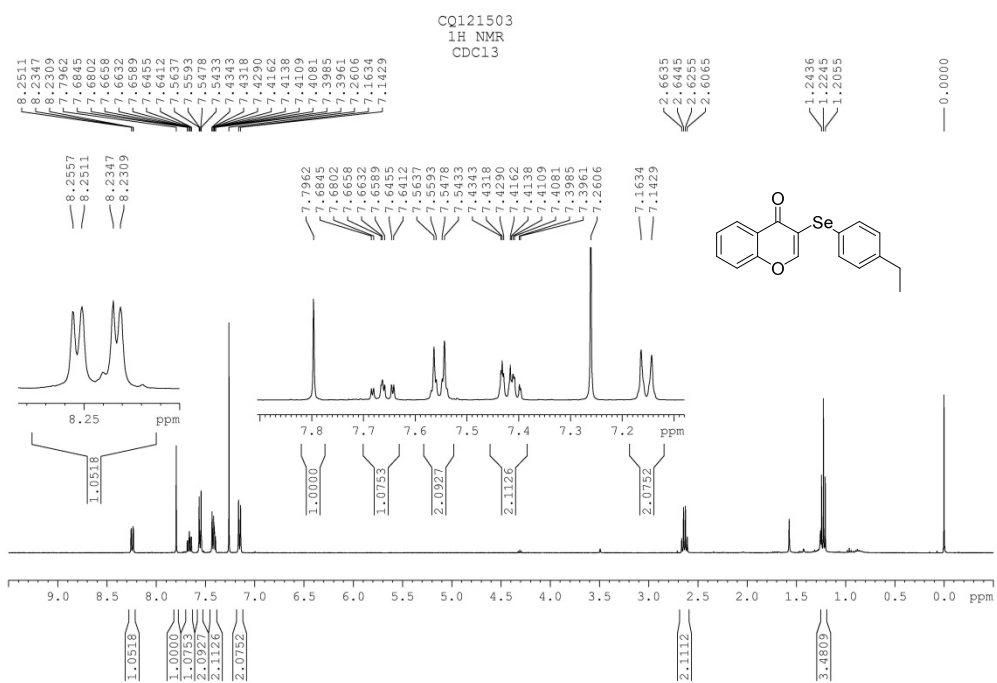

Fig. 32 <sup>1</sup>H NMR spectrum of compound 3f

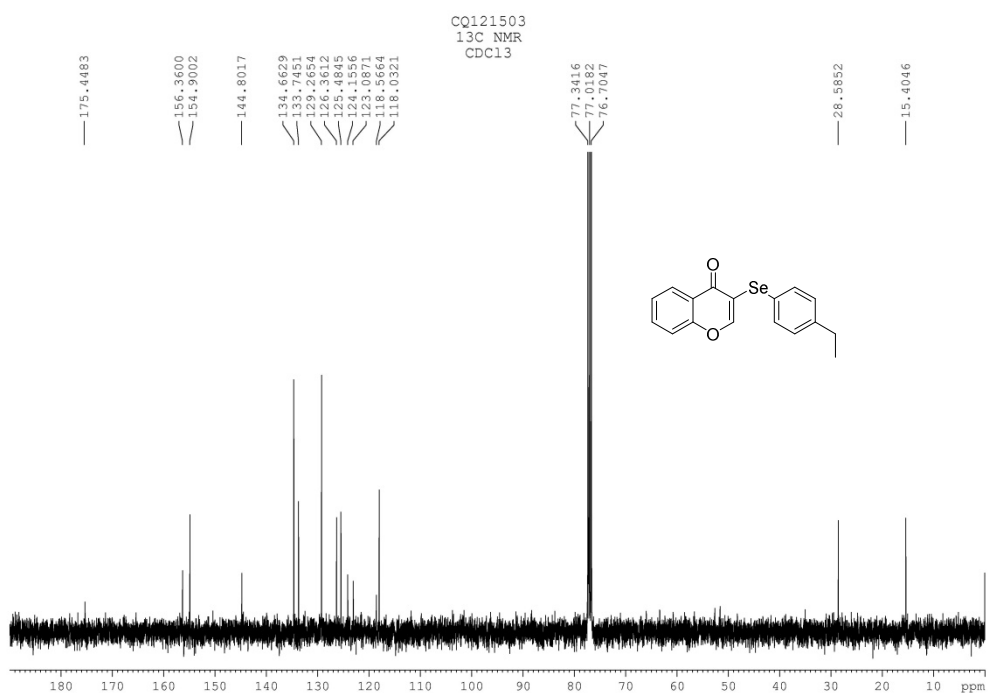

Fig. 33  $^{13}\text{C}$  NMR spectrum of compound 3f

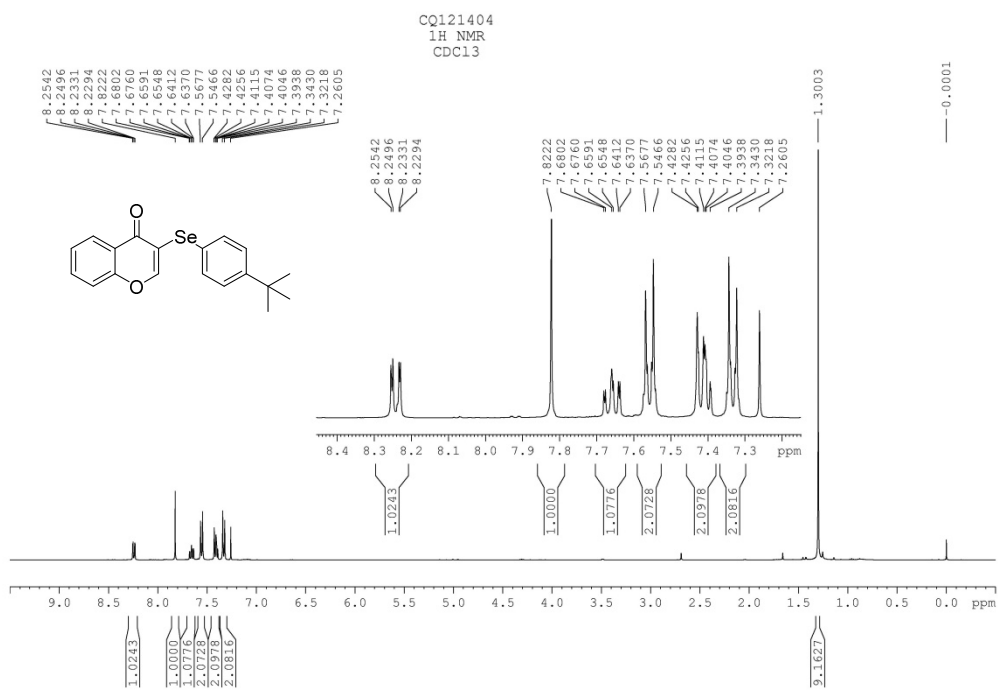

Fig. 34  $^1\text{H}$  NMR spectrum of compound 3g

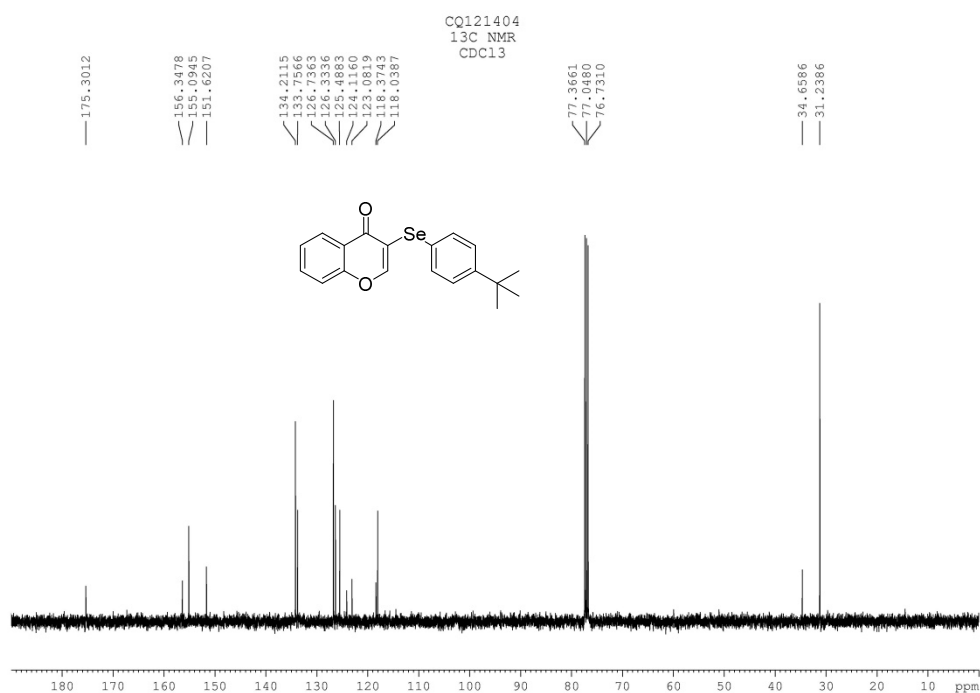

**Fig. 35**  $^{13}\text{C}$  NMR spectrum of compound **3g**

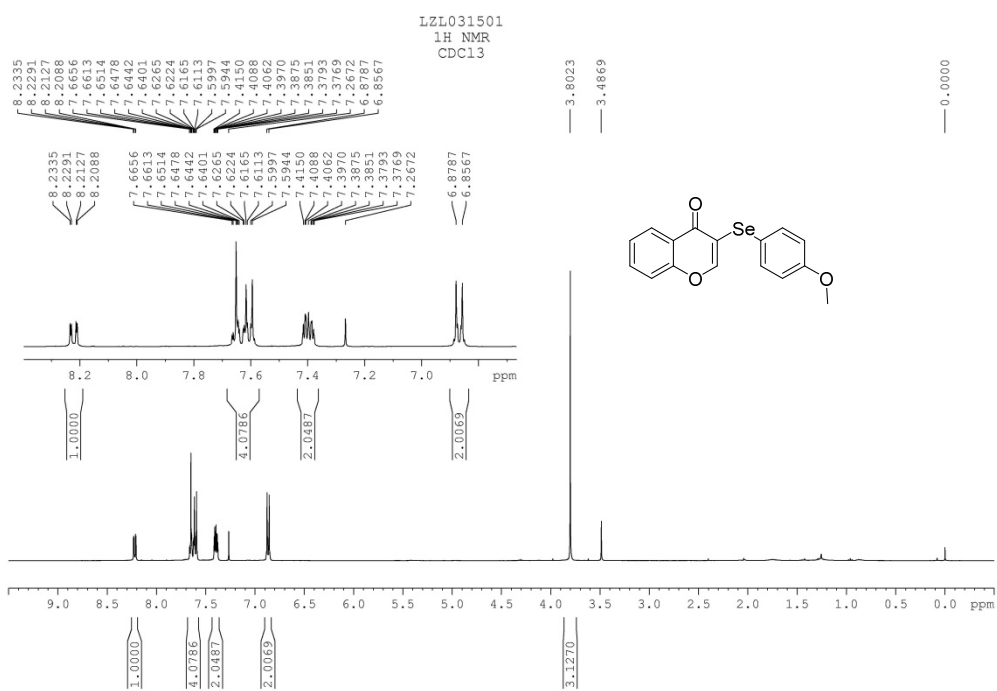

**Fig. 36**  $^1\text{H}$  NMR spectrum of compound **3h**

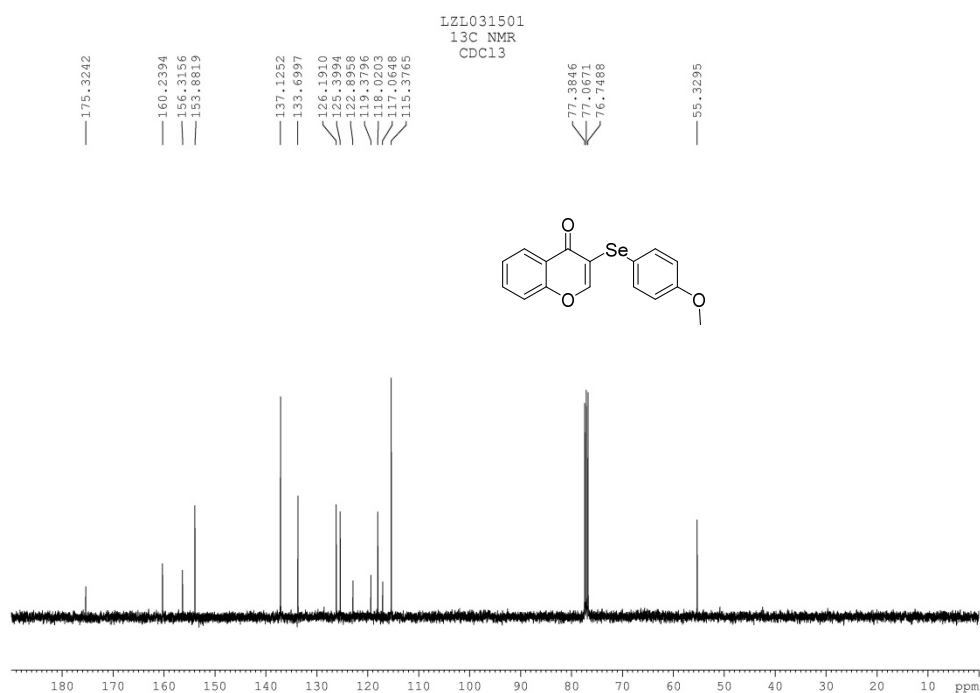

**Fig. 37**  $^{13}\text{C}$  NMR spectrum of compound **3h**

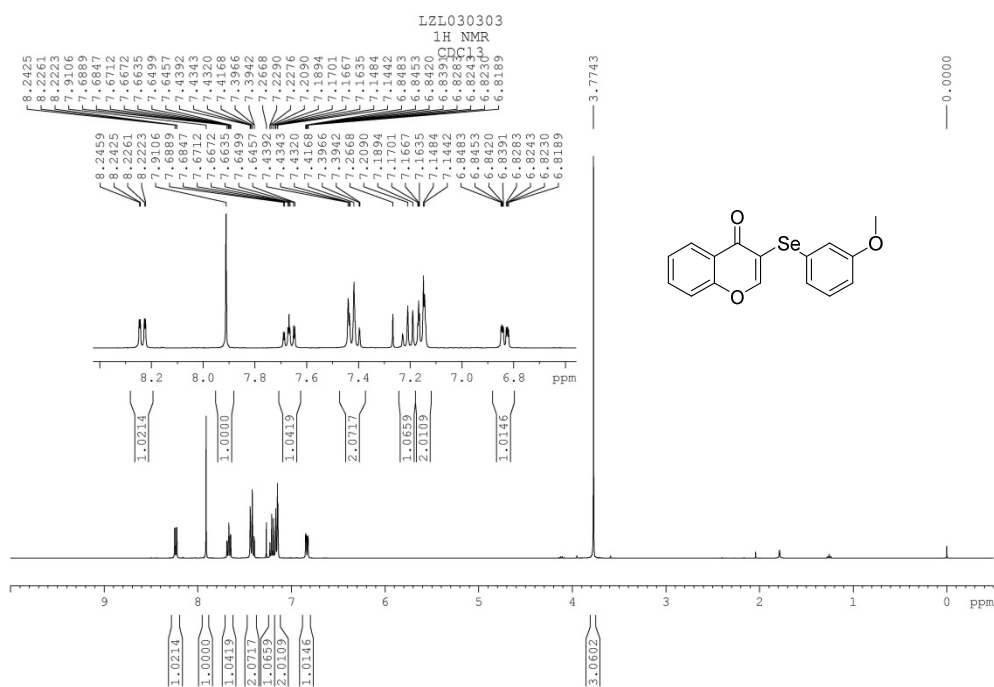

**Fig. 38**  $^1\text{H}$  NMR spectrum of compound **3i**

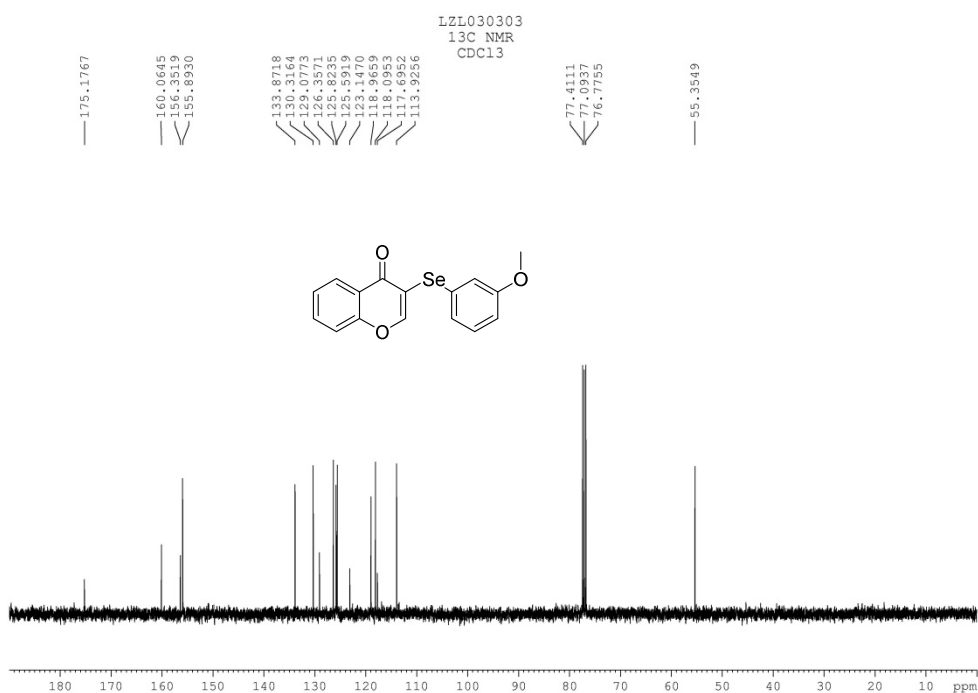

Fig. 39  $^{13}\text{C}$  NMR spectrum of compound 3i

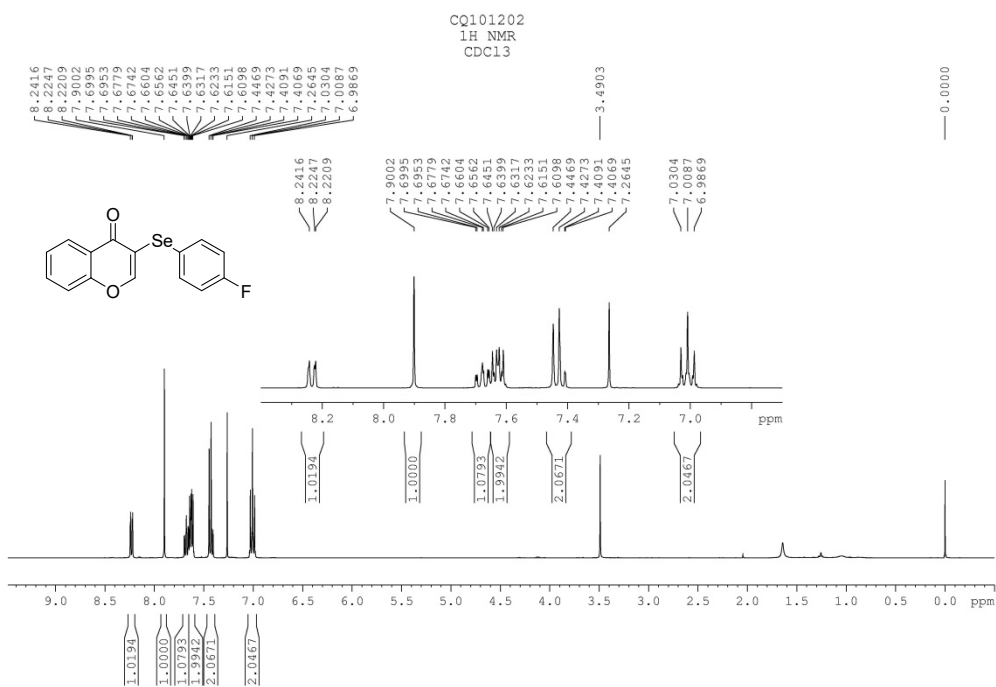

Fig. 40  $^1\text{H}$  NMR spectrum of compound 3j

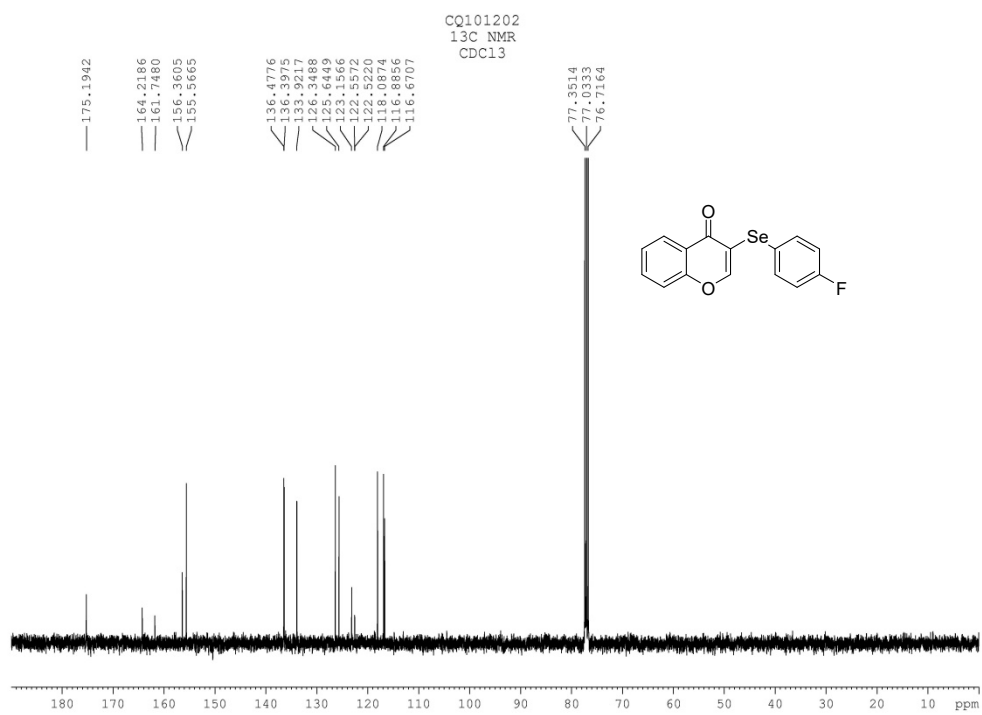

Fig. 41 <sup>13</sup>C NMR spectrum of compound 3j

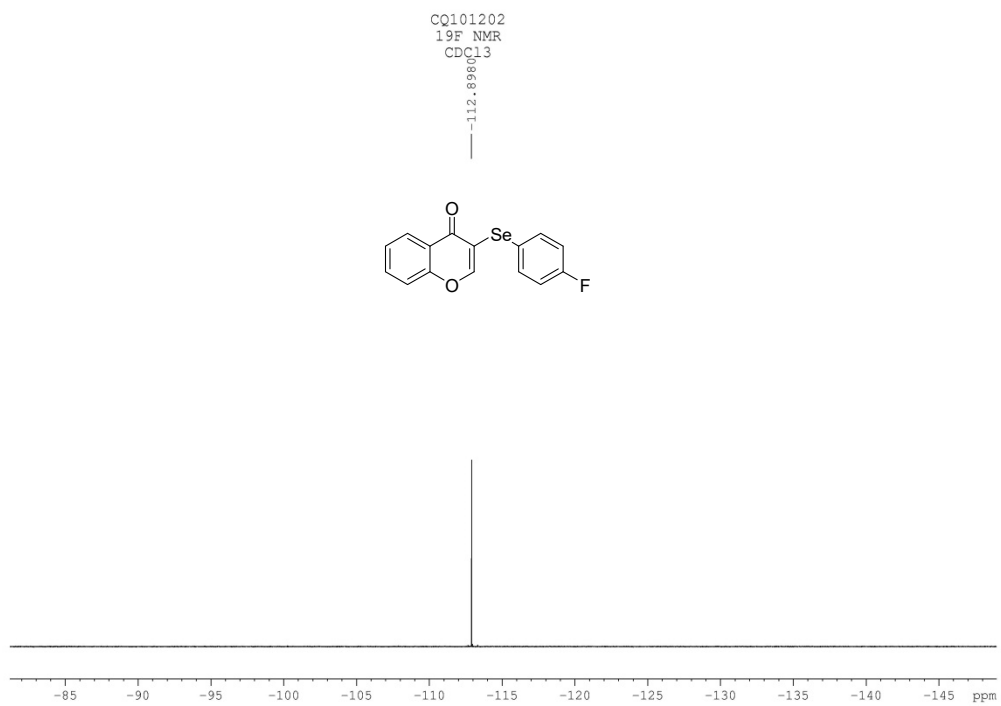

Fig. 42 <sup>19</sup>F NMR spectrum of compound 3j

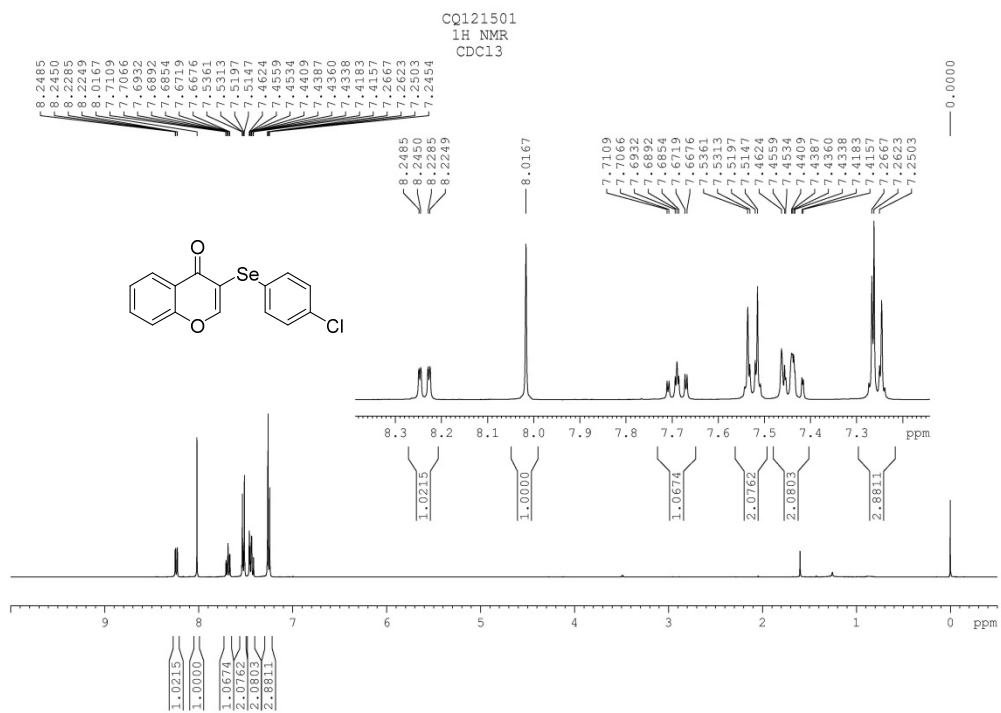

Fig. 43  $^1\text{H}$  NMR spectrum of compound 3k

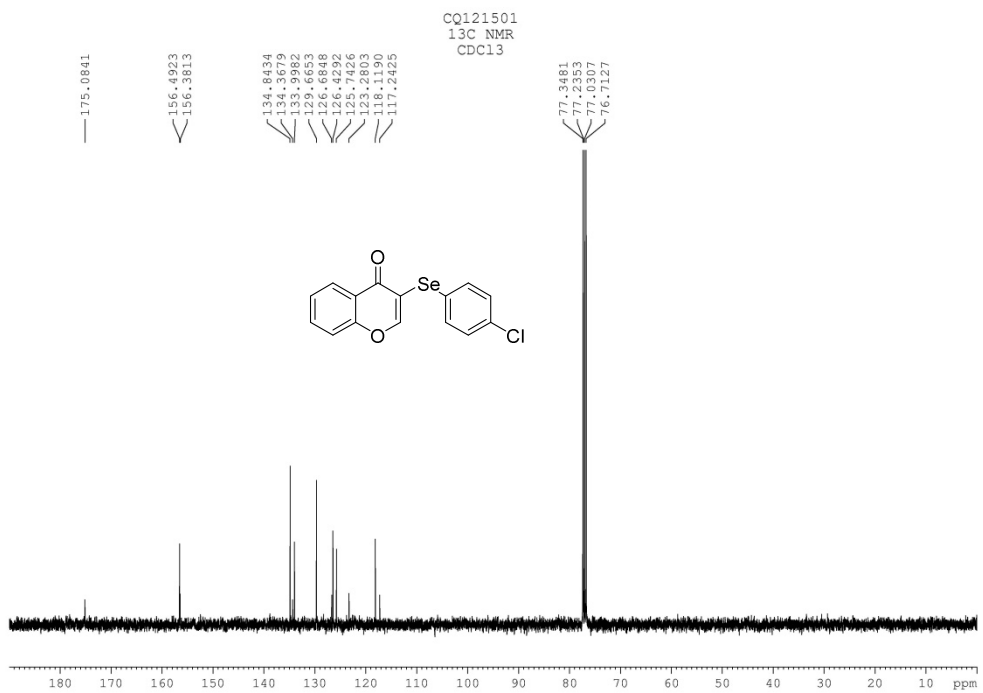

Fig. 44  $^{13}\text{C}$  NMR spectrum of compound 3k



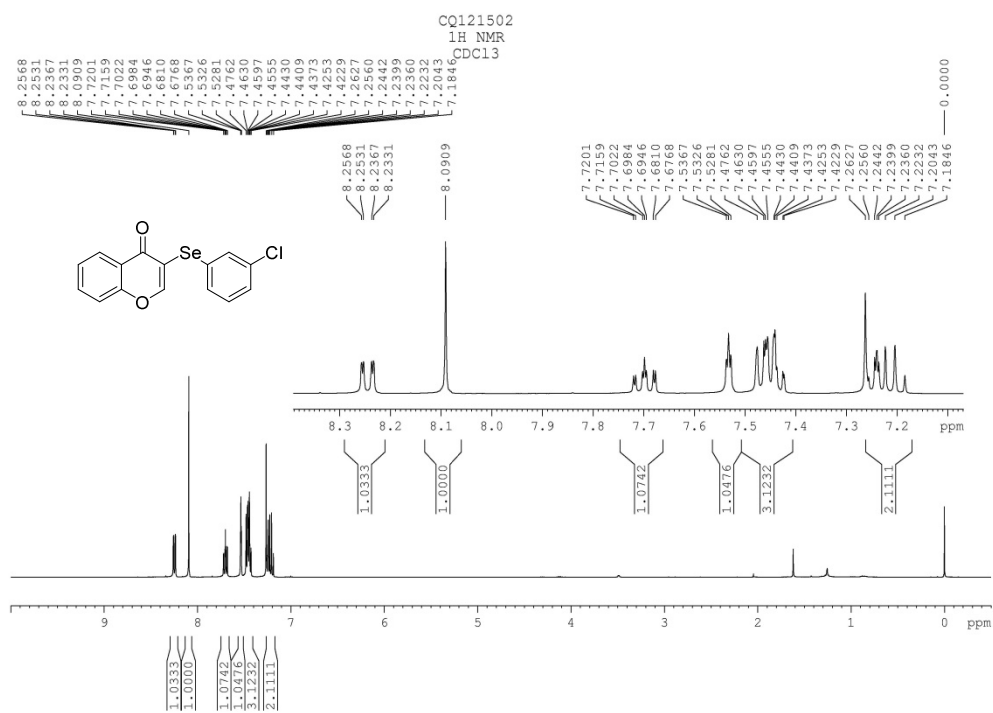

Fig. 45  $^1\text{H}$  NMR spectrum of compound 3I

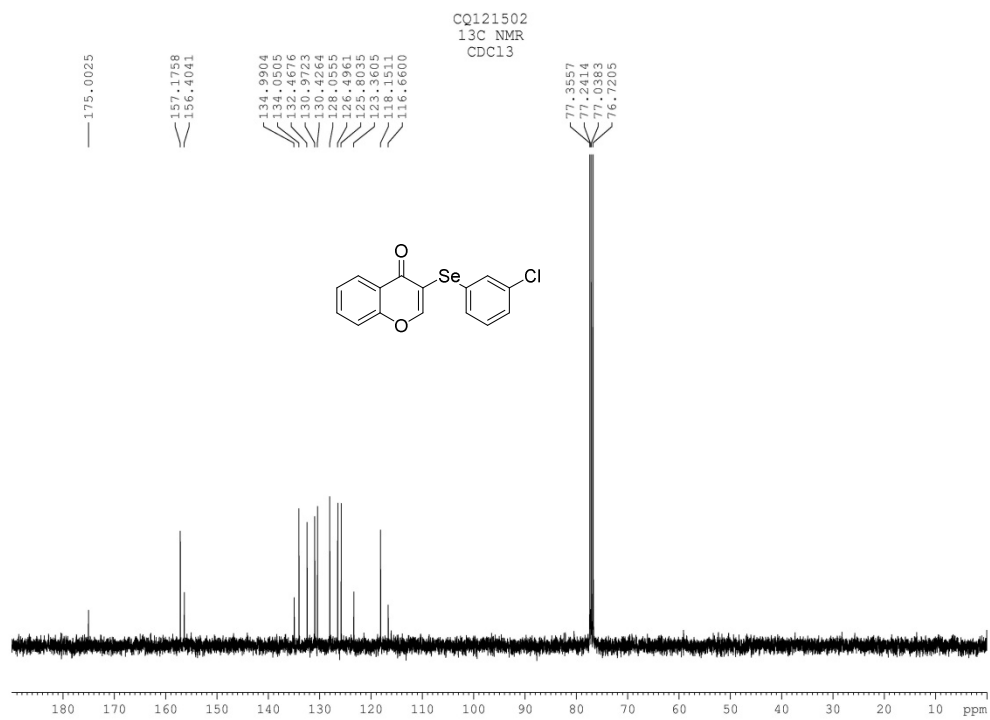

Fig. 46  $^{13}\text{C}$  NMR spectrum of compound 3I

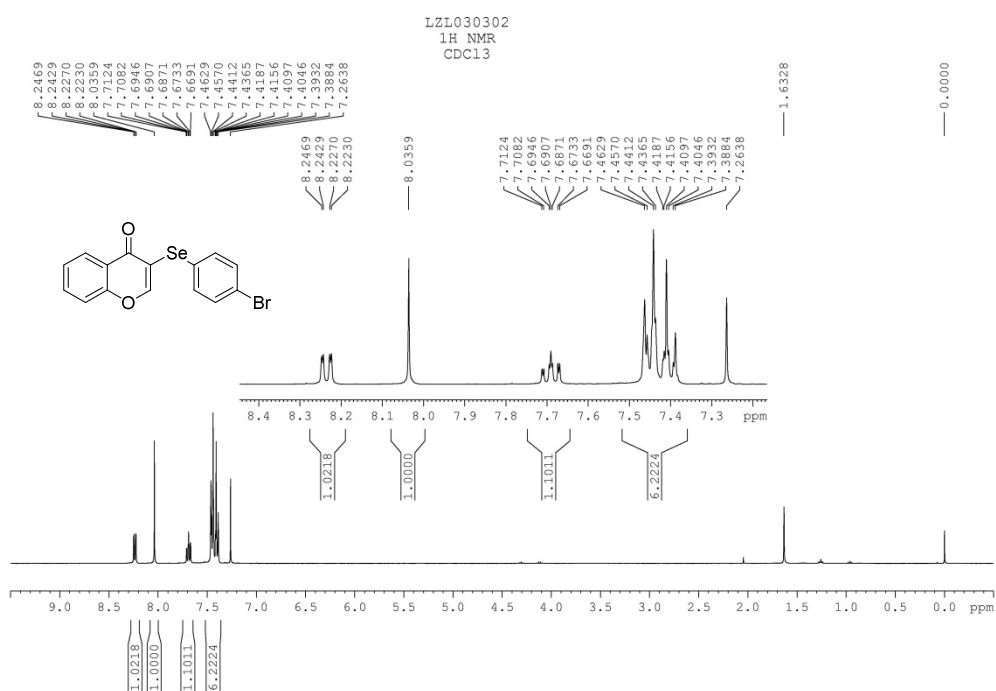

Fig. 47  $^1\text{H}$  NMR spectrum of compound 3m

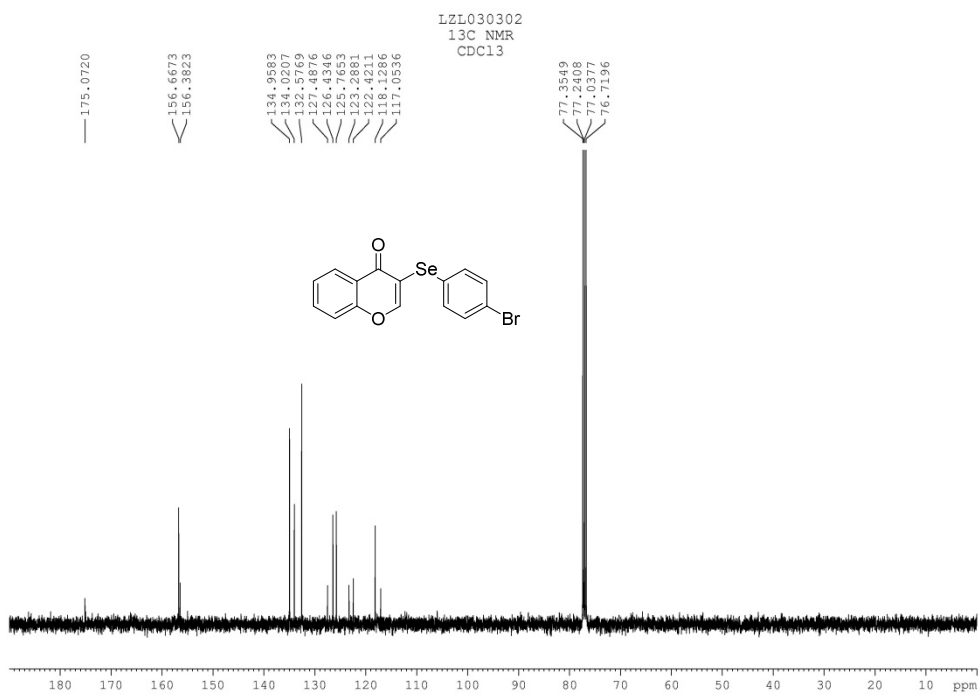

Fig. 48  $^{13}\text{C}$  NMR spectrum of compound 3m

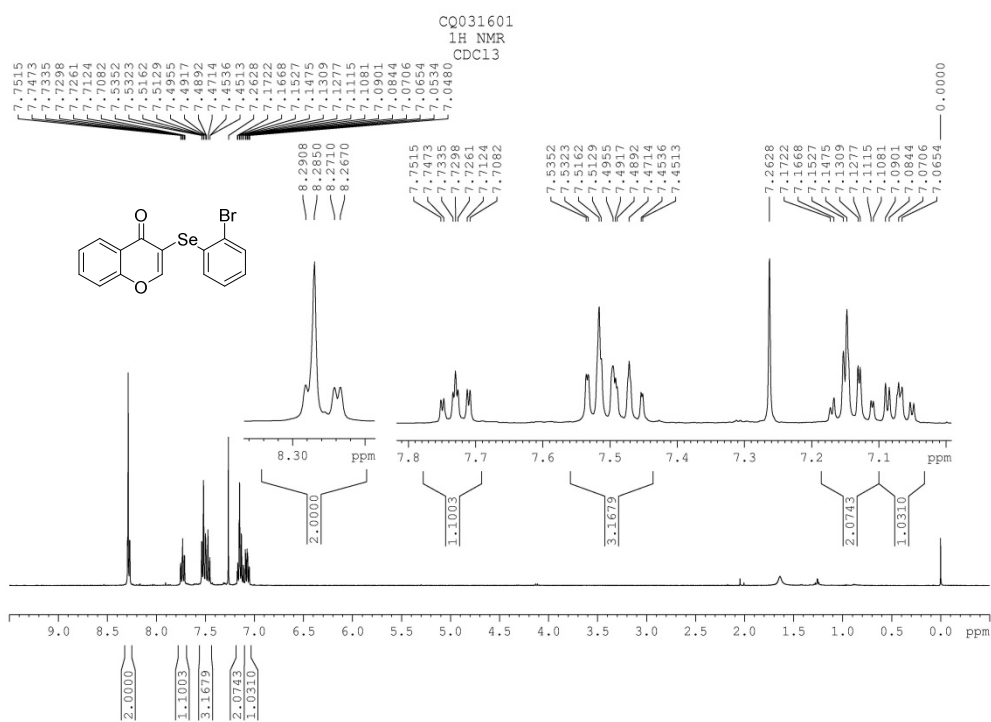

Fig. 49 <sup>1</sup>H NMR spectrum of compound 3n

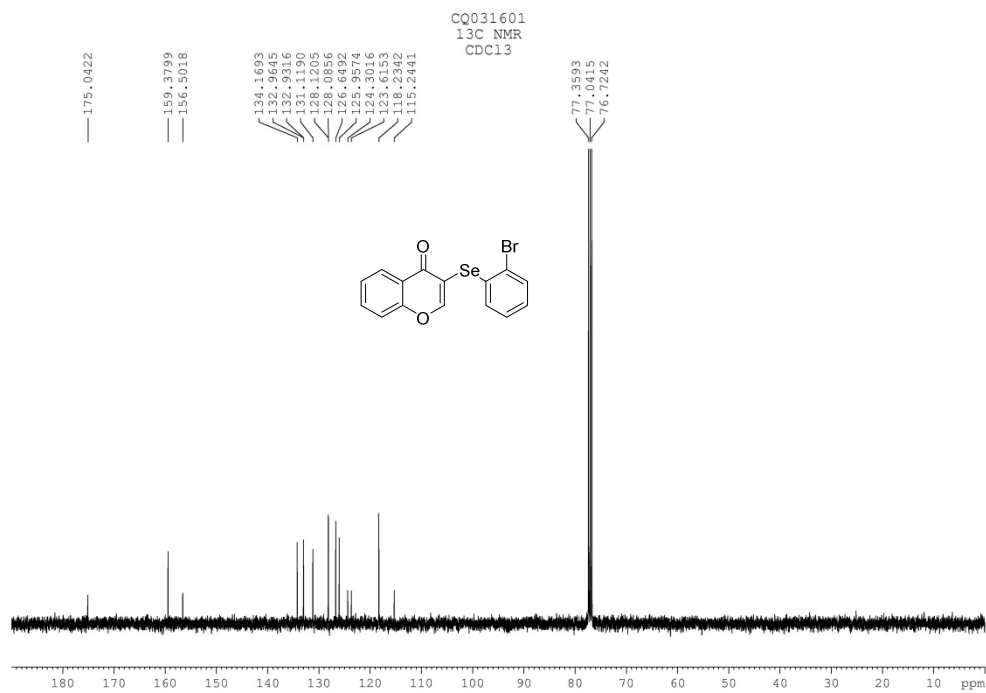

Fig. 50 <sup>13</sup>C NMR spectrum of compound 3n

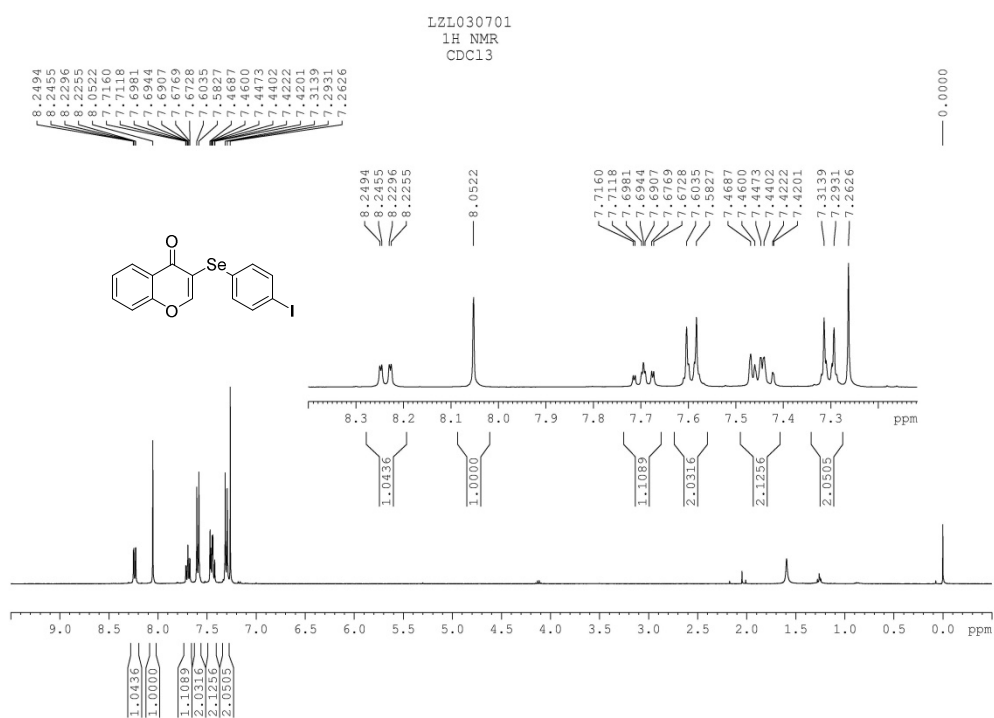

Fig. 51 <sup>1</sup>H NMR spectrum of compound 3o

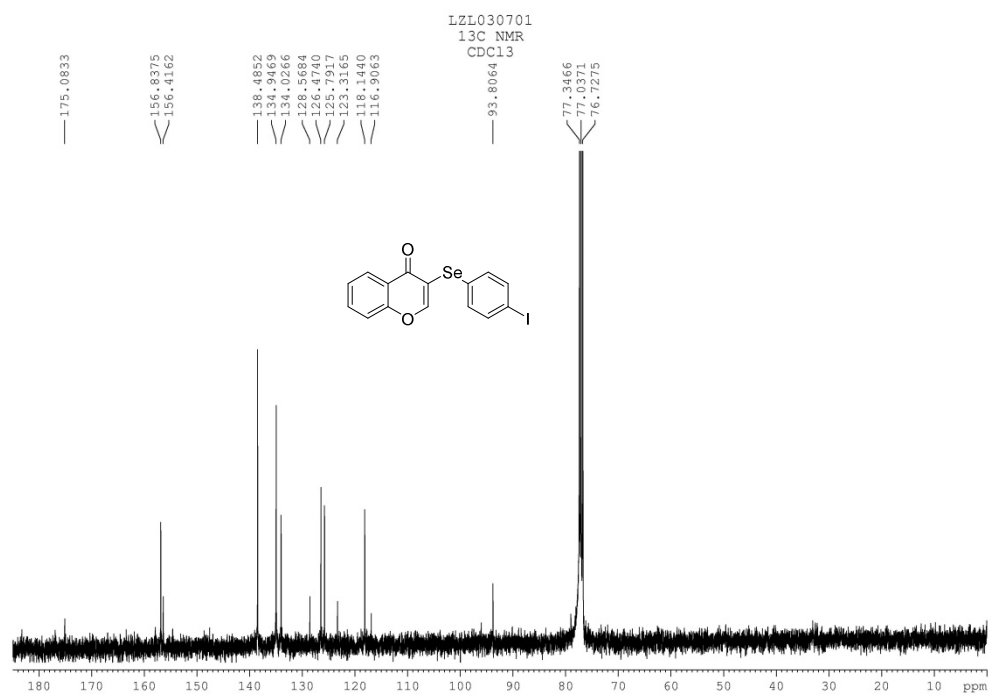

Fig. 52 <sup>13</sup>C NMR spectrum of compound 3o

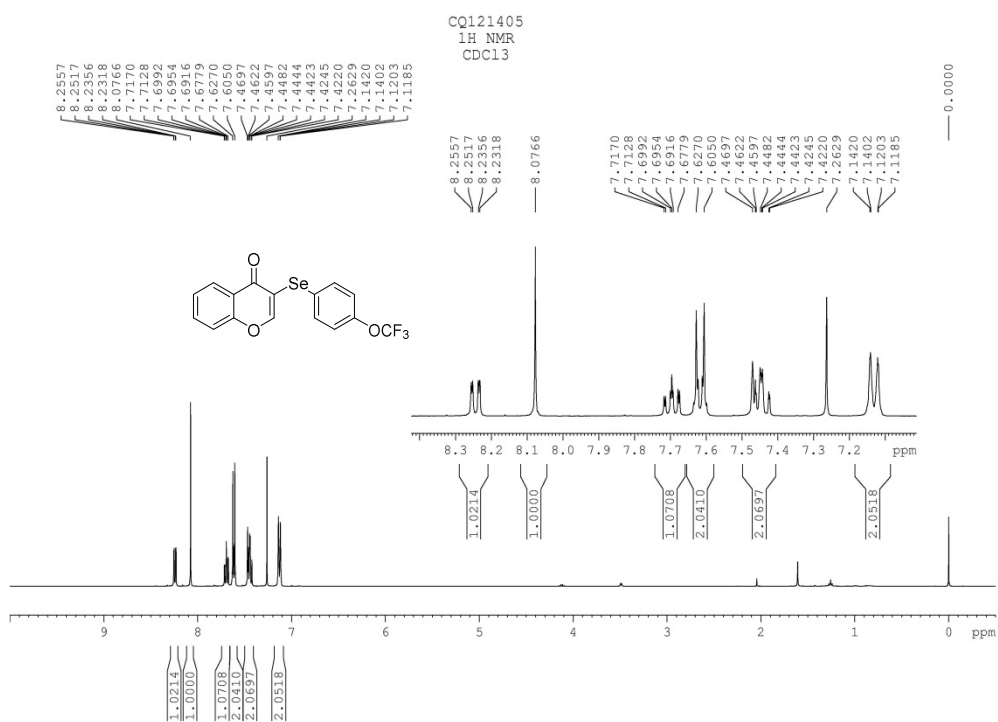

Fig. 53 <sup>1</sup>H NMR spectrum of compound 3p

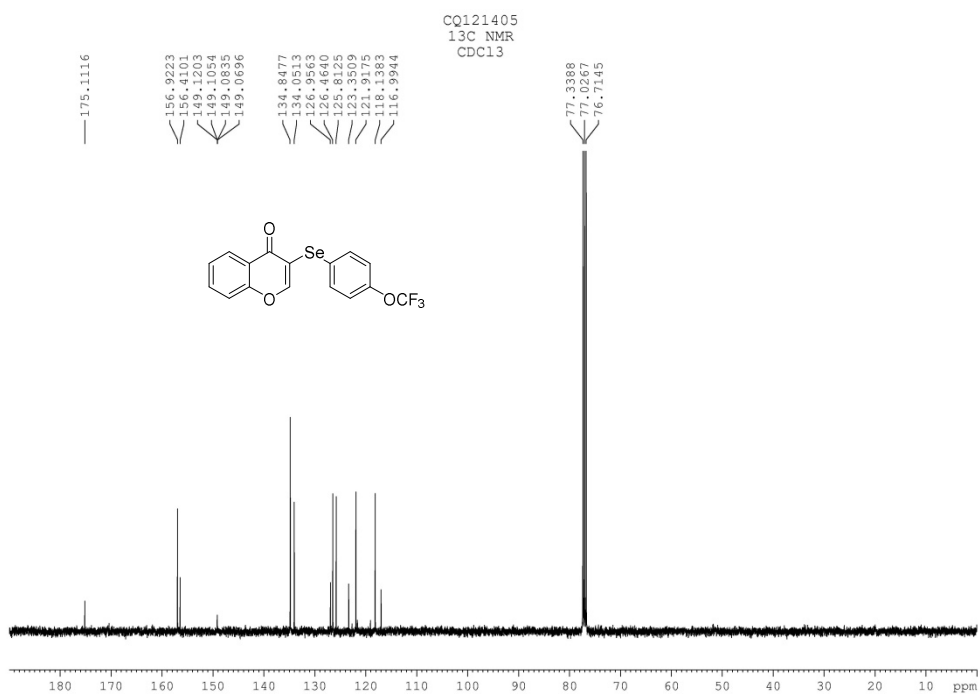

Fig. 54 <sup>13</sup>C NMR spectrum of compound 3p



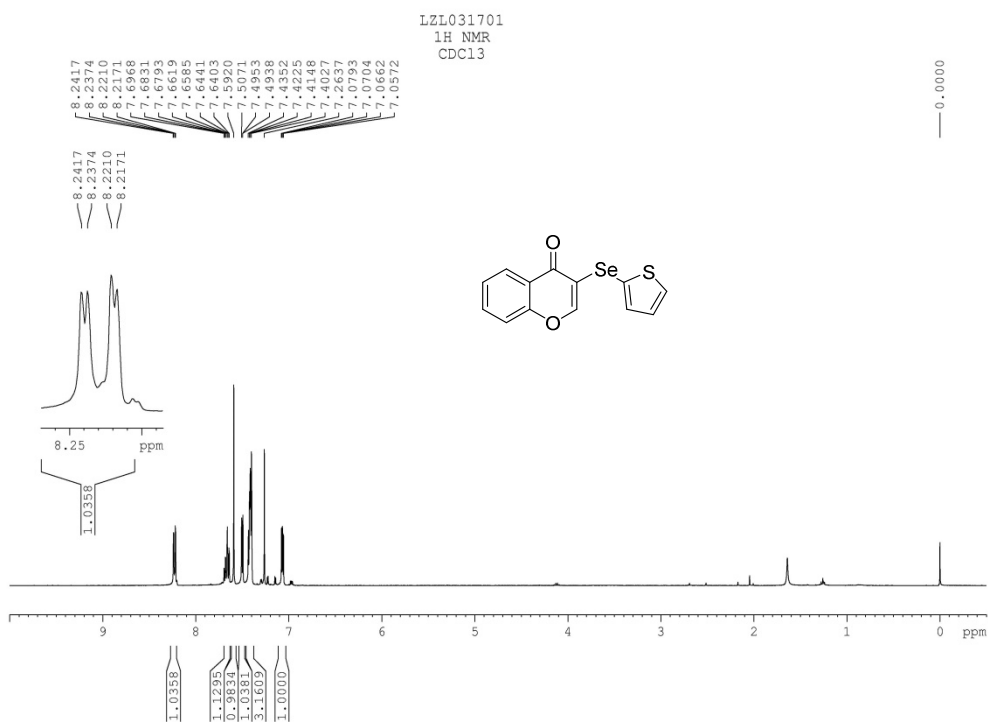

Fig. 57  $^1\text{H}$  NMR spectrum of compound 3r

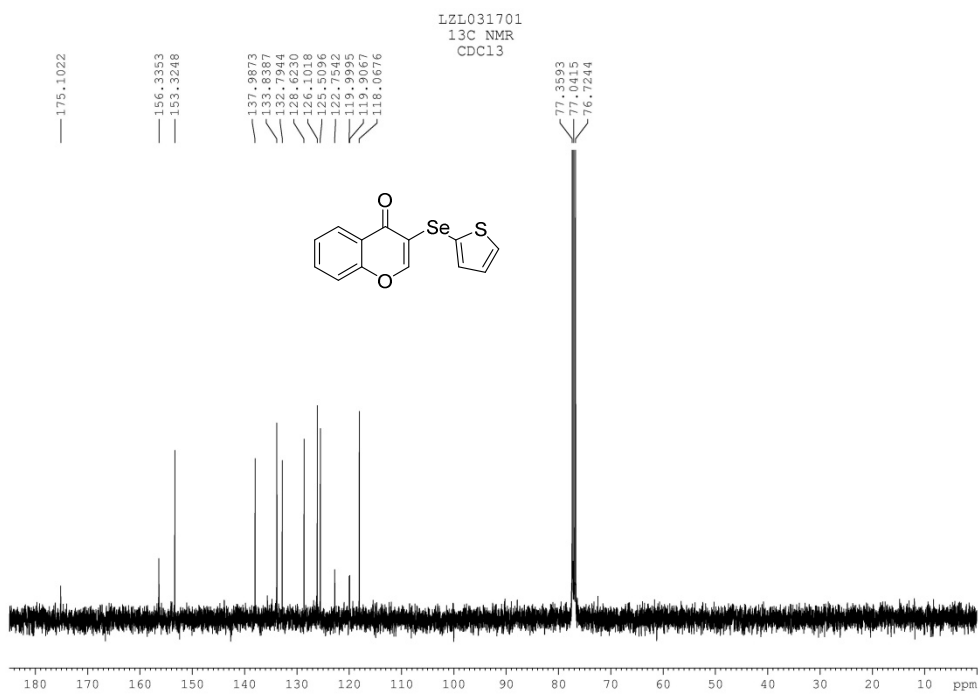

Fig. 58  $^{13}\text{C}$  NMR spectrum of compound 3r

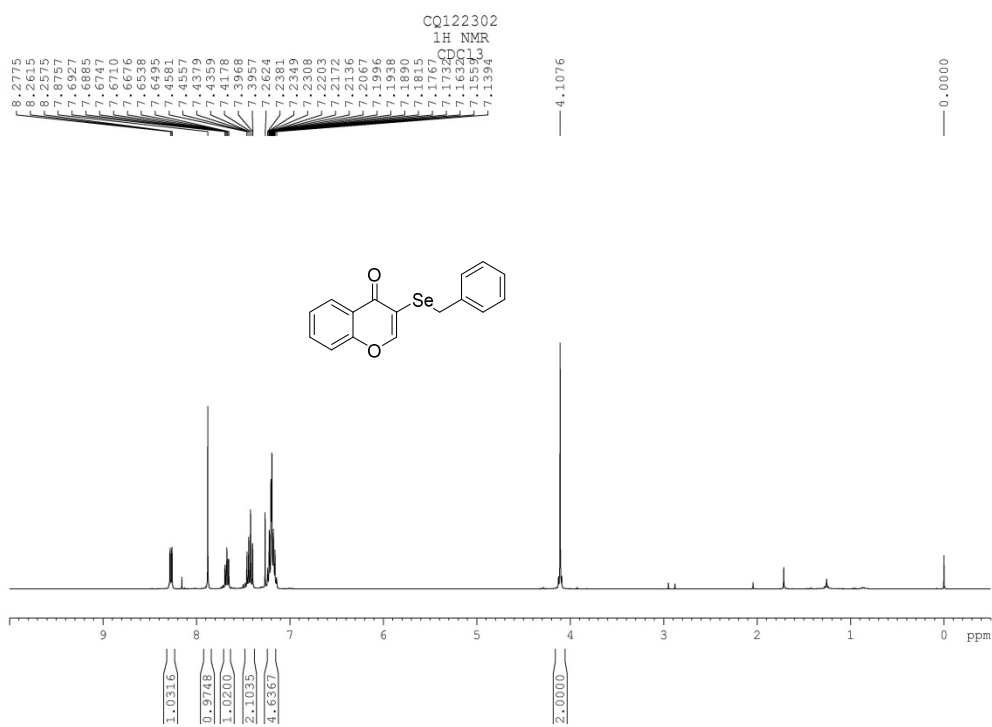

Fig. 59  $^1\text{H}$  NMR spectrum of compound **3s**

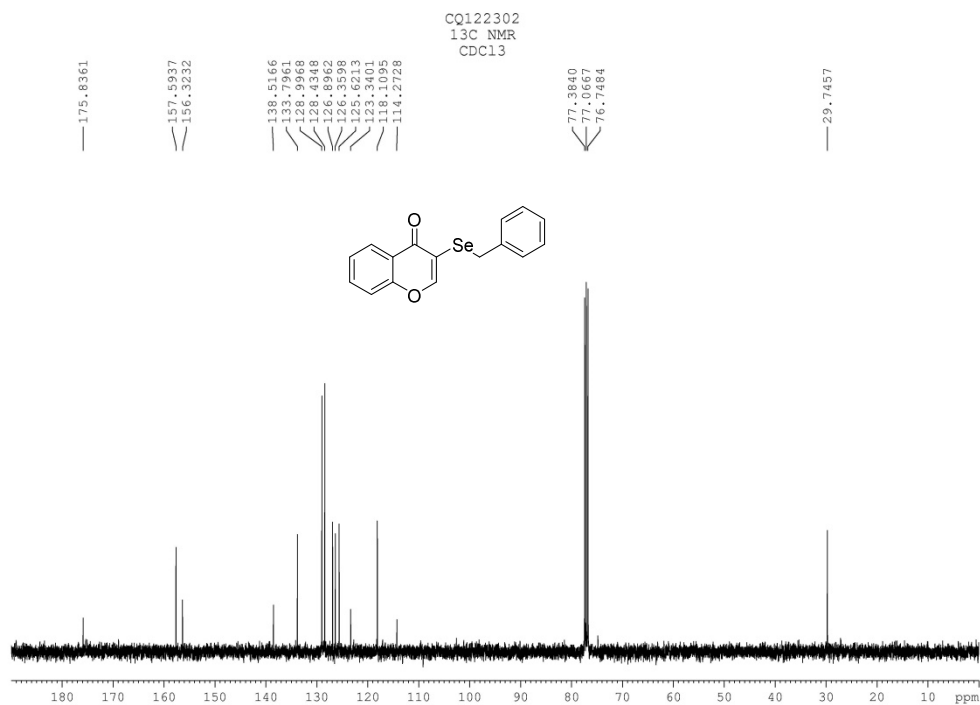

Fig. 60  $^{13}\text{C}$  NMR spectrum of compound **3s**



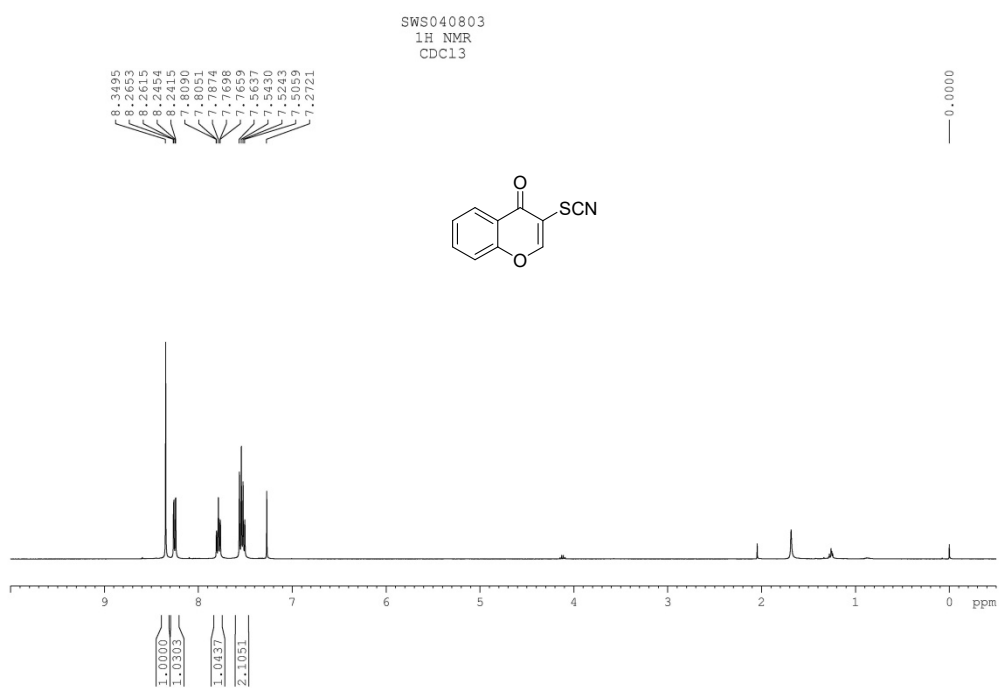

Fig. 61 <sup>1</sup>H NMR spectrum of compound 5a

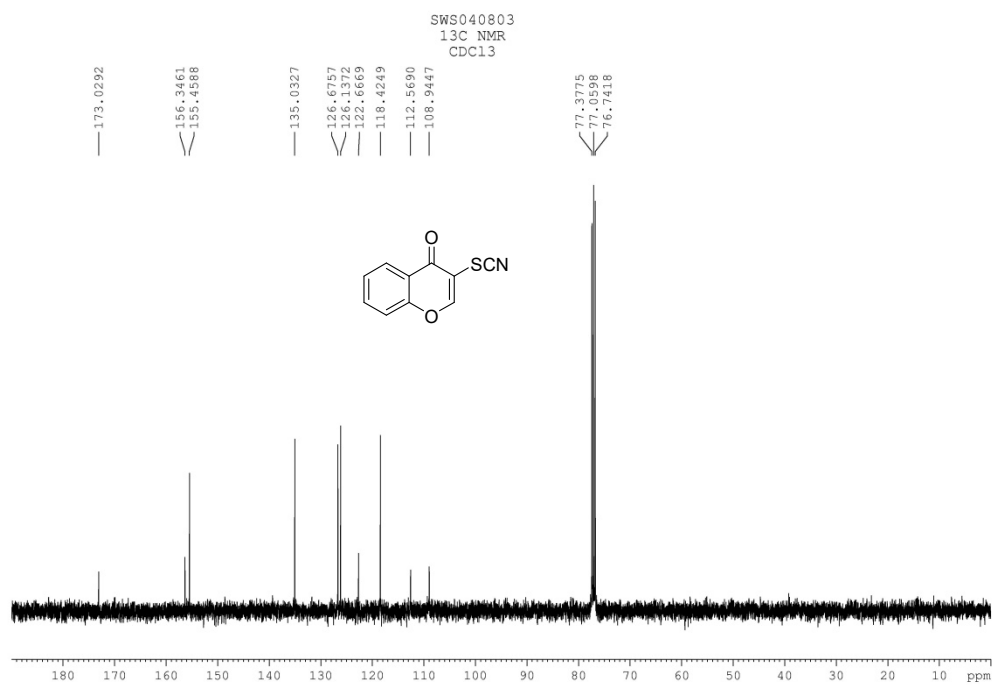

Fig. 62 <sup>13</sup>C NMR spectrum of compound 5a

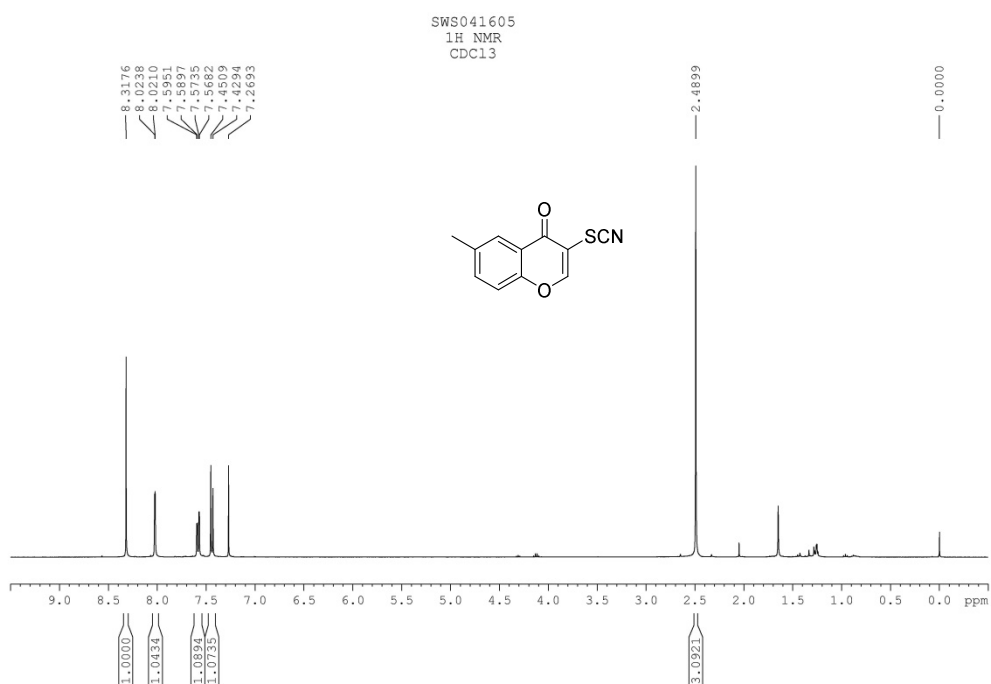

Fig. 63  $^1\text{H}$  NMR spectrum of compound 5b

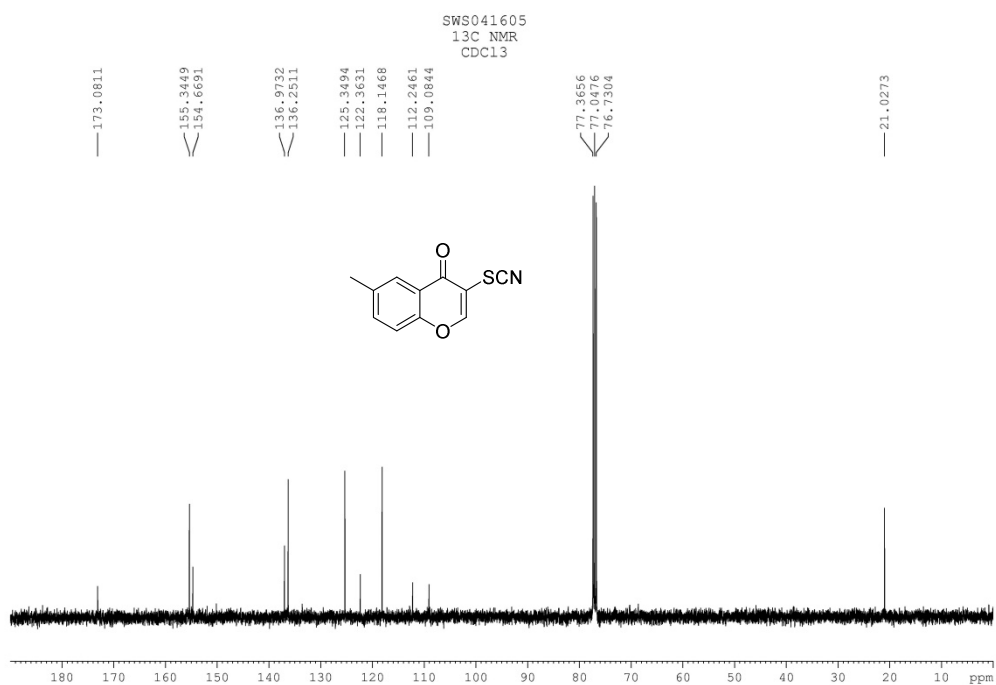

Fig. 64  $^{13}\text{C}$  NMR spectrum of compound 5b

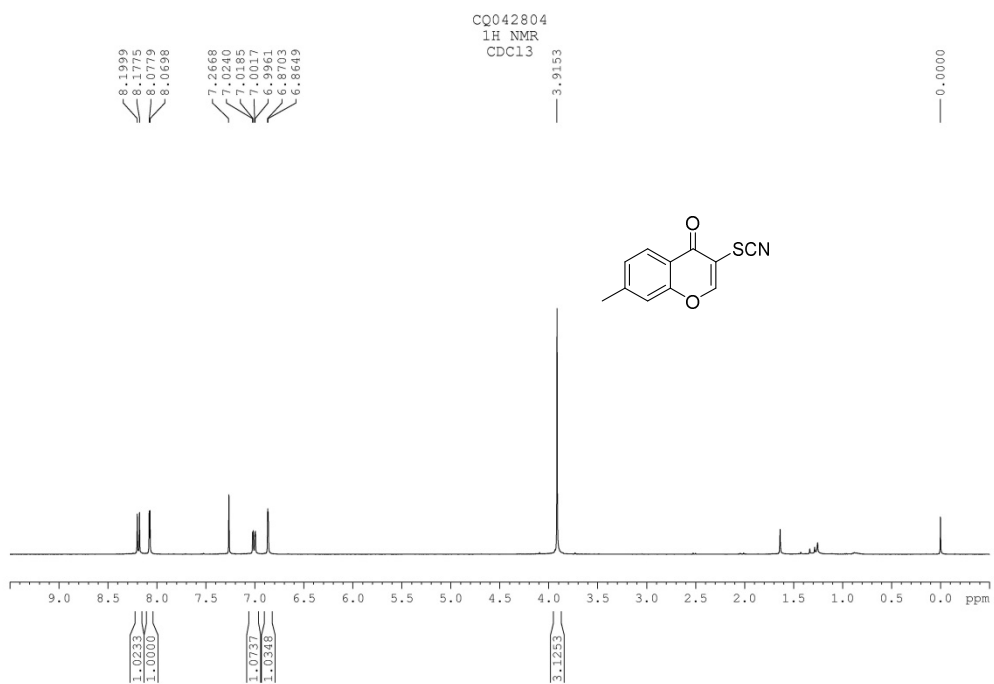

**Fig. 65**  $^1\text{H}$  NMR spectrum of compound **5c**

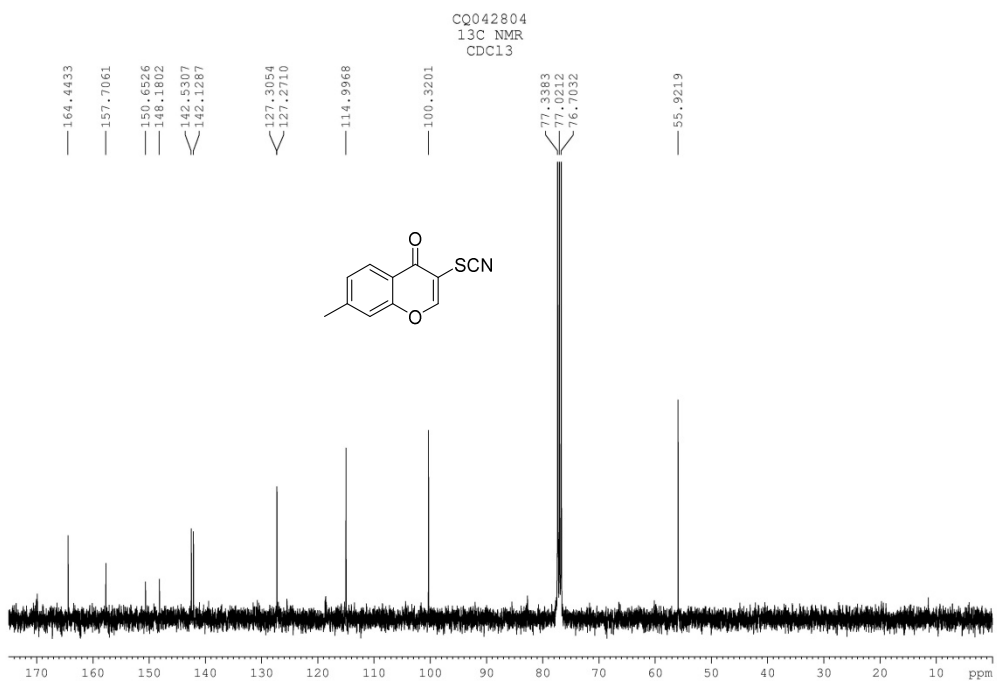

**Fig. 66**  $^{13}\text{C}$  NMR spectrum of compound **5c**

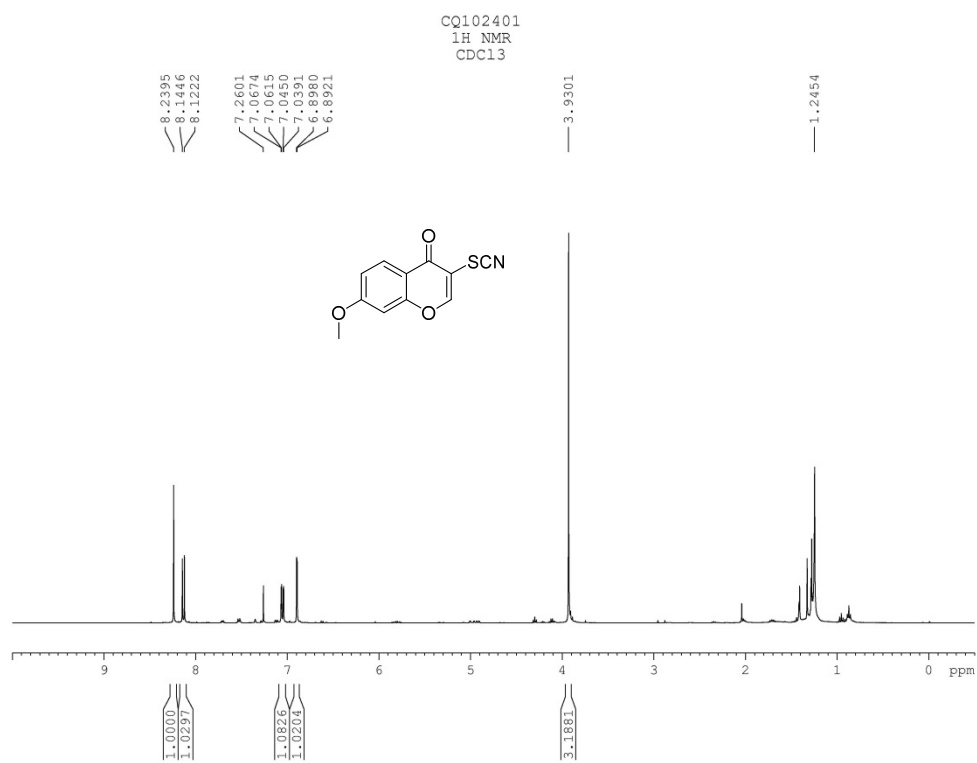

**Fig. 67**  $^1\text{H}$  NMR spectrum of compound **5d**

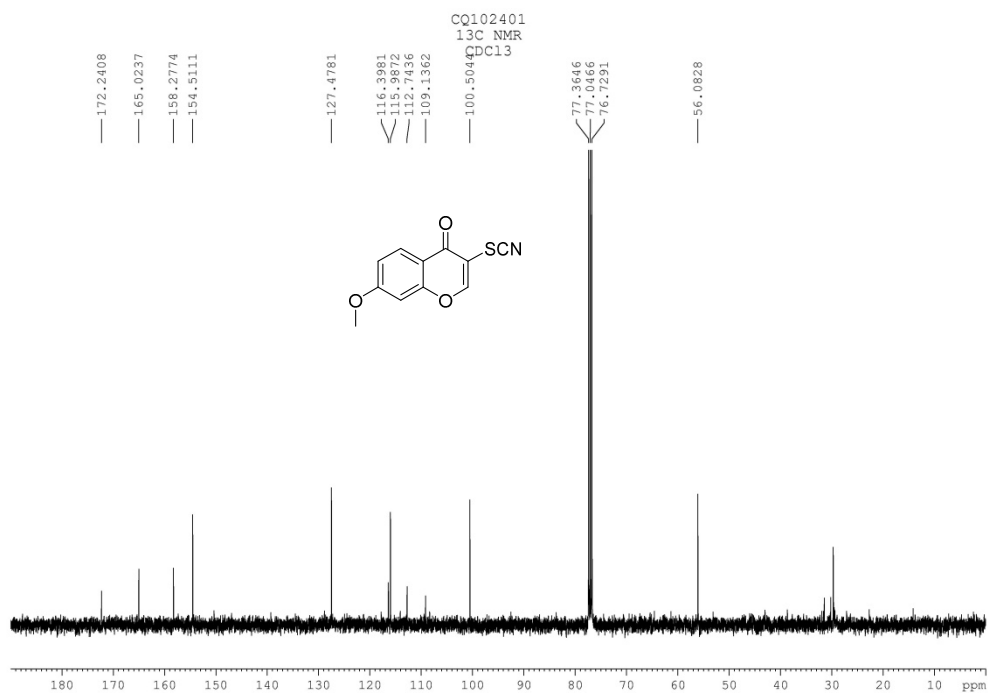

**Fig. 68**  $^{13}\text{C}$  NMR spectrum of compound **5d**

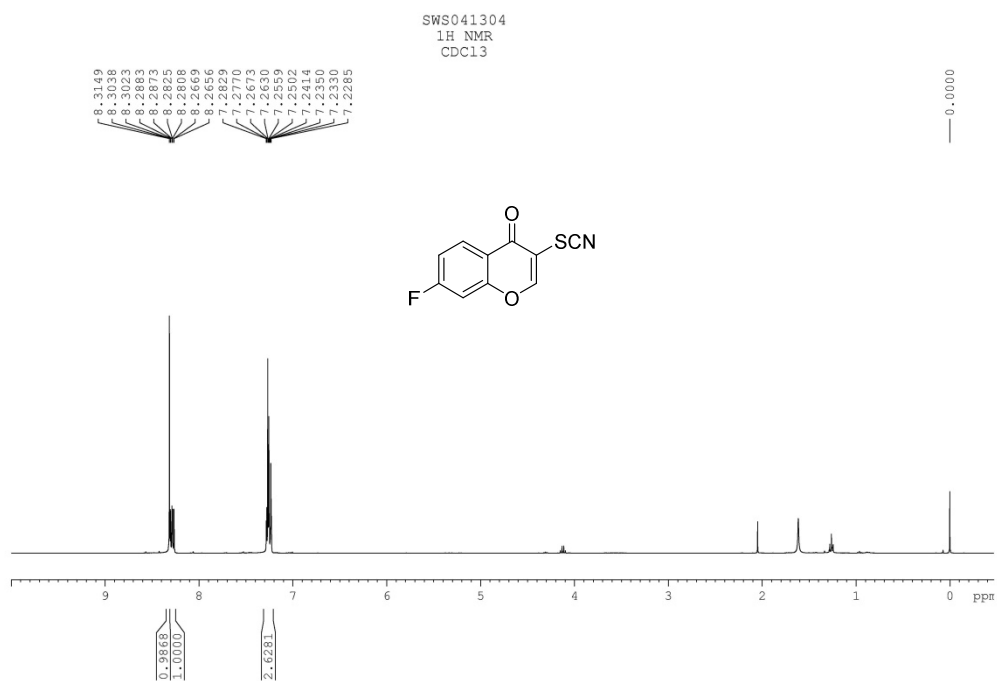

Fig. 69 <sup>1</sup>H NMR spectrum of compound 5e

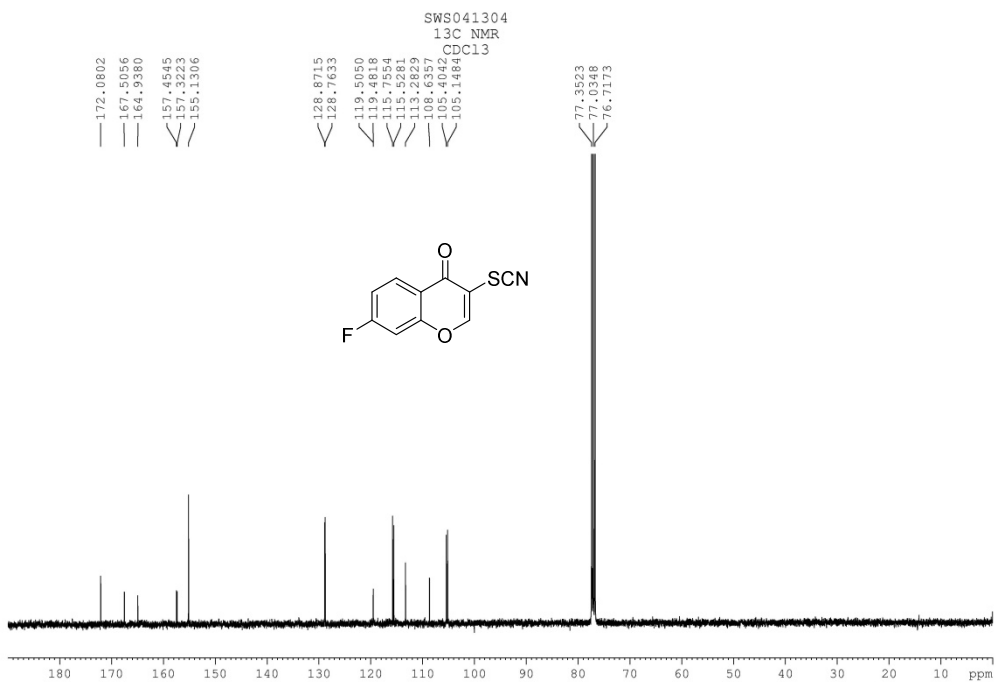

Fig. 70 <sup>13</sup>C NMR spectrum of compound 5e

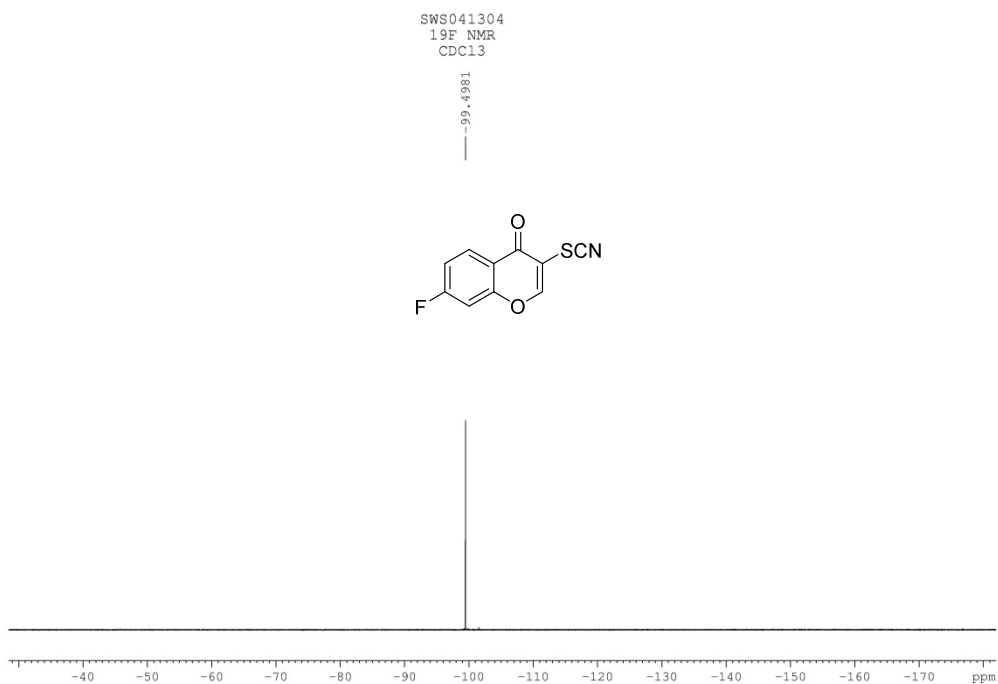

**Fig. 71** <sup>19</sup>F NMR spectrum of compound **5e**

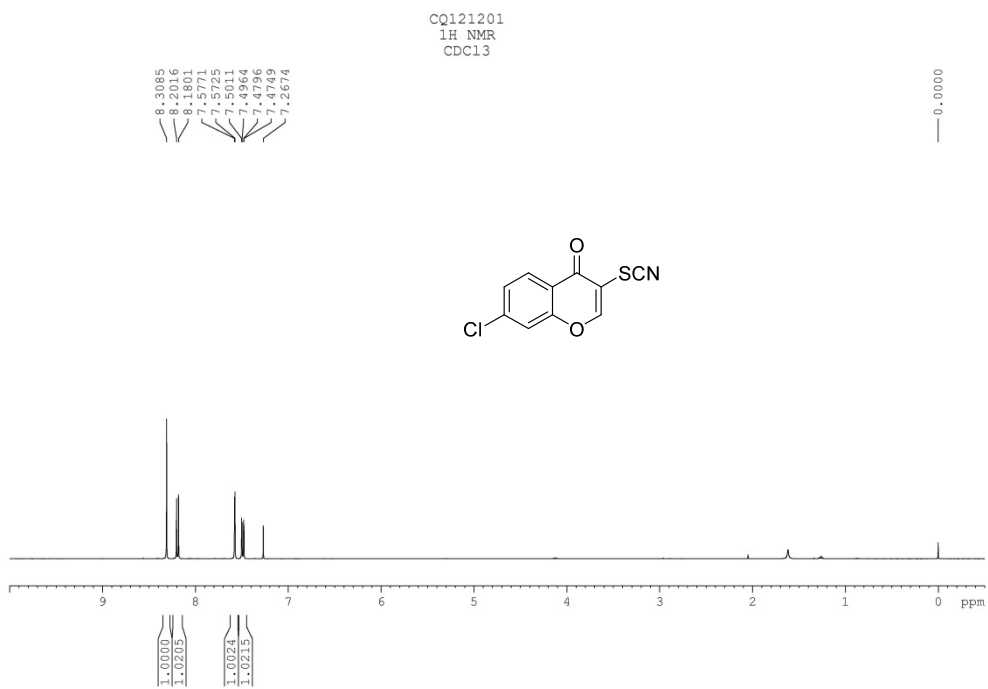

**Fig. 72** <sup>1</sup>H NMR spectrum of compound **5f**

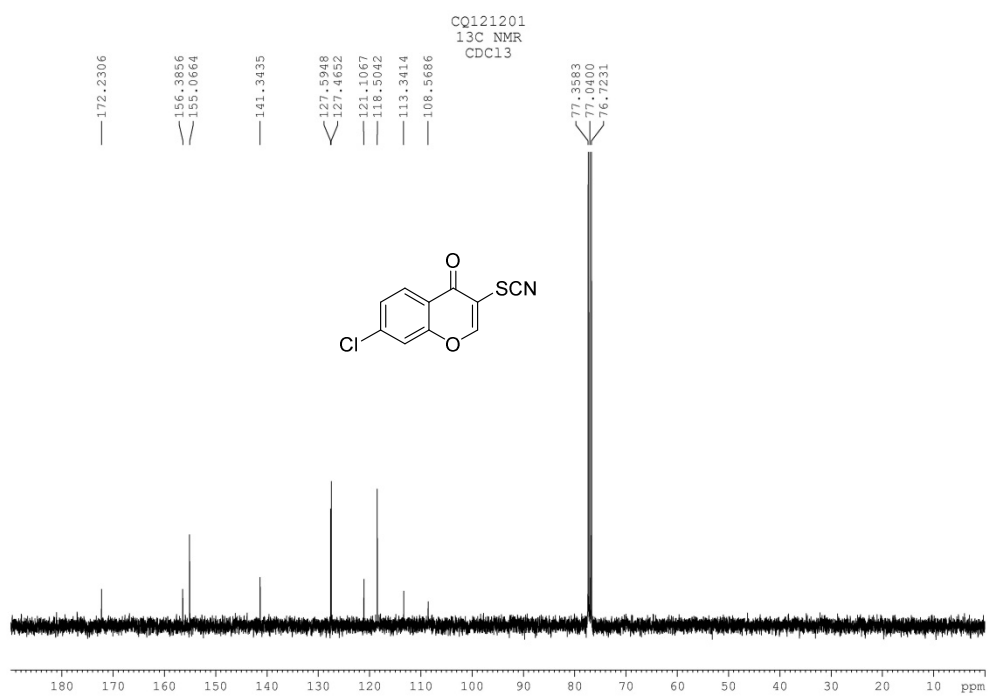

Fig. 73  $^{13}\text{C}$  NMR spectrum of compound 5f

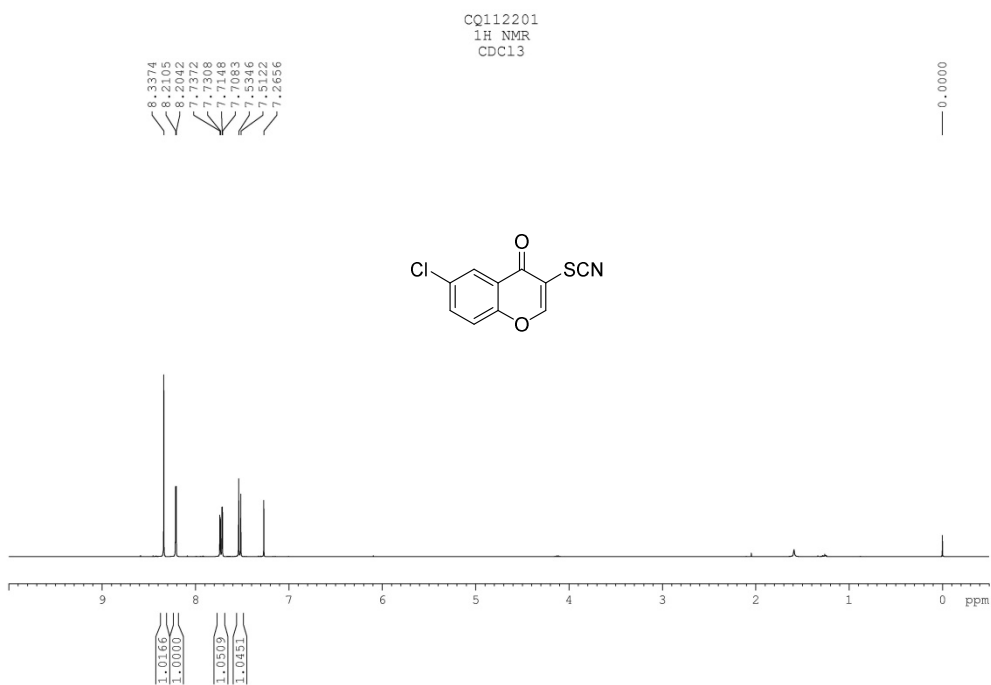

Fig. 74  $^1\text{H}$  NMR spectrum of compound 5g

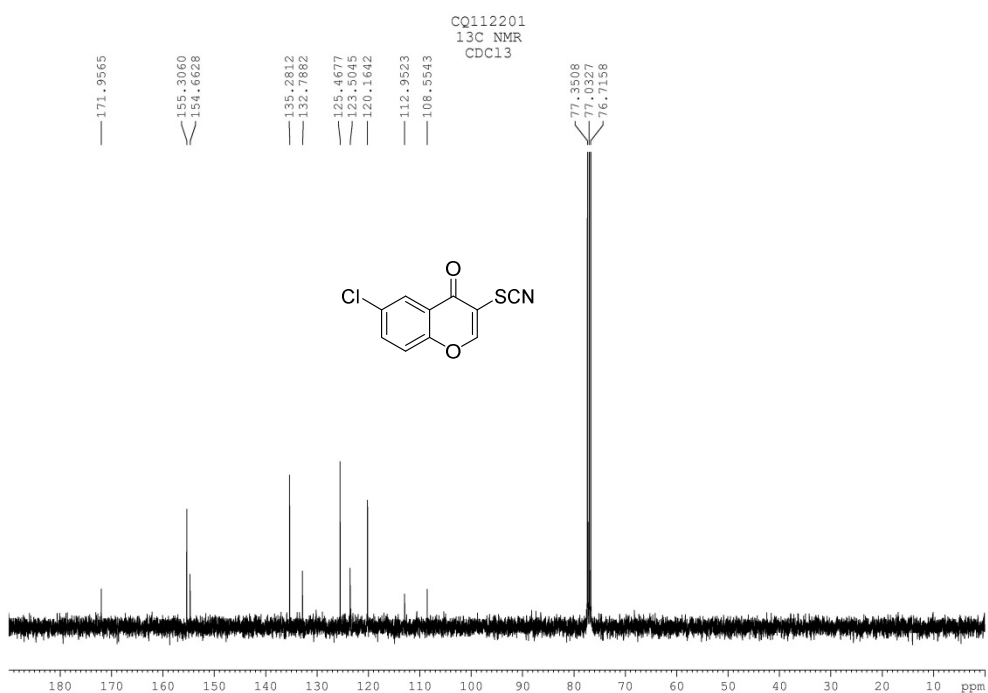

Fig. 75 <sup>13</sup>C NMR spectrum of compound 5g

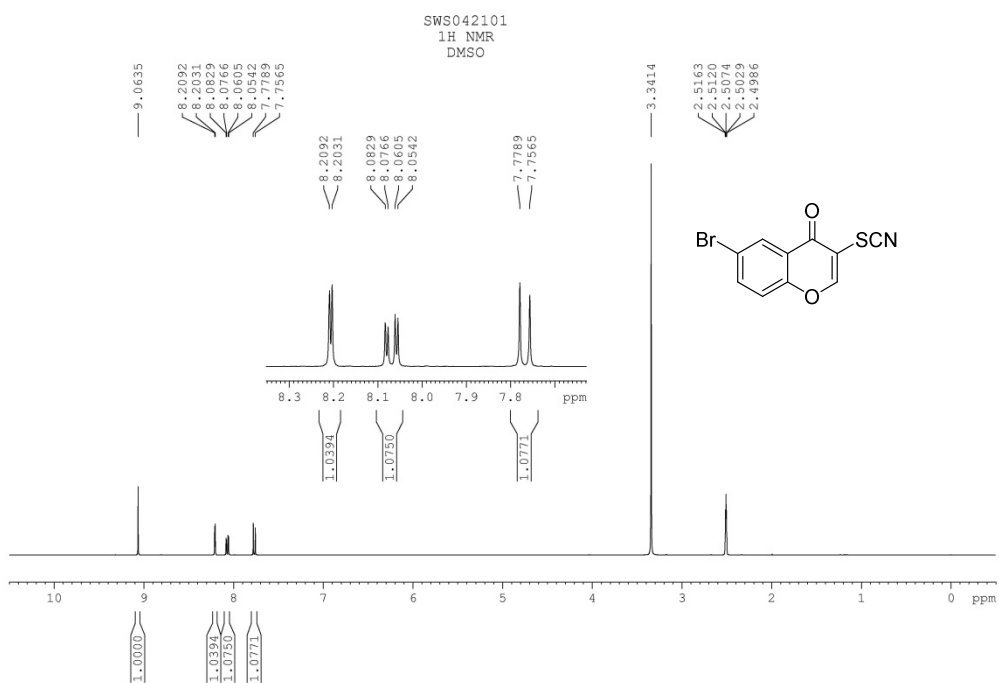

Fig. 76 <sup>1</sup>H NMR spectrum of compound 5h



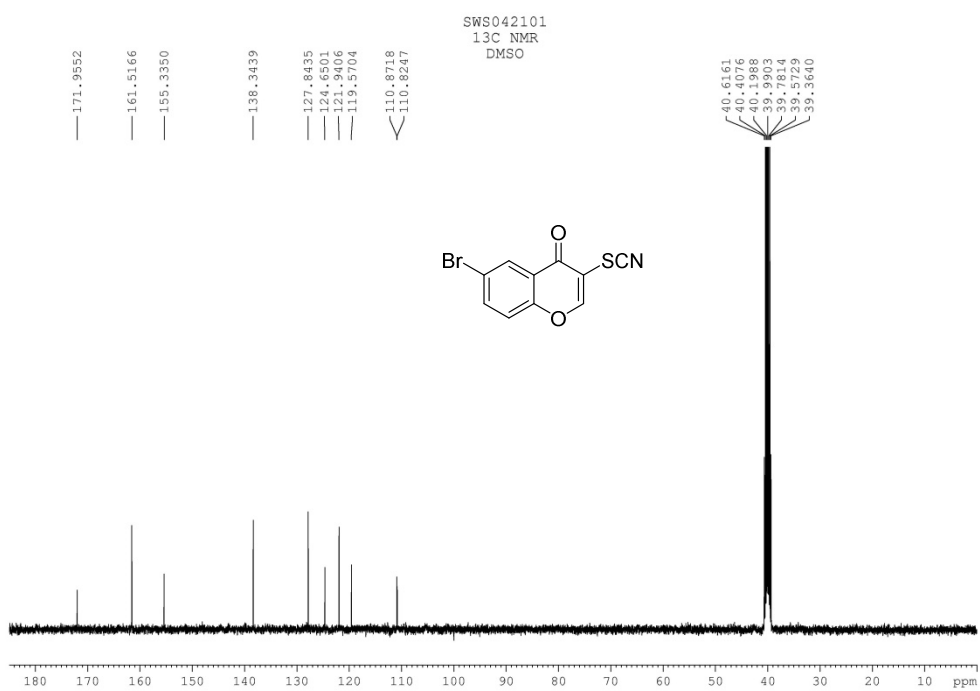

Fig. 77 <sup>13</sup>C NMR spectrum of compound 5h

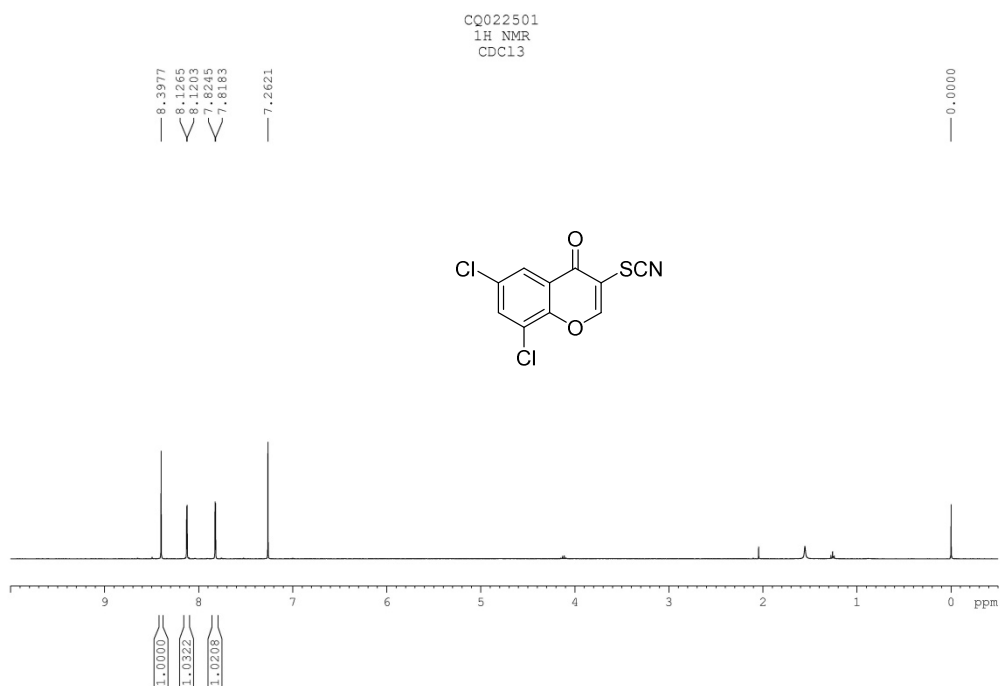

Fig. 78 <sup>1</sup>H NMR spectrum of compound 5j

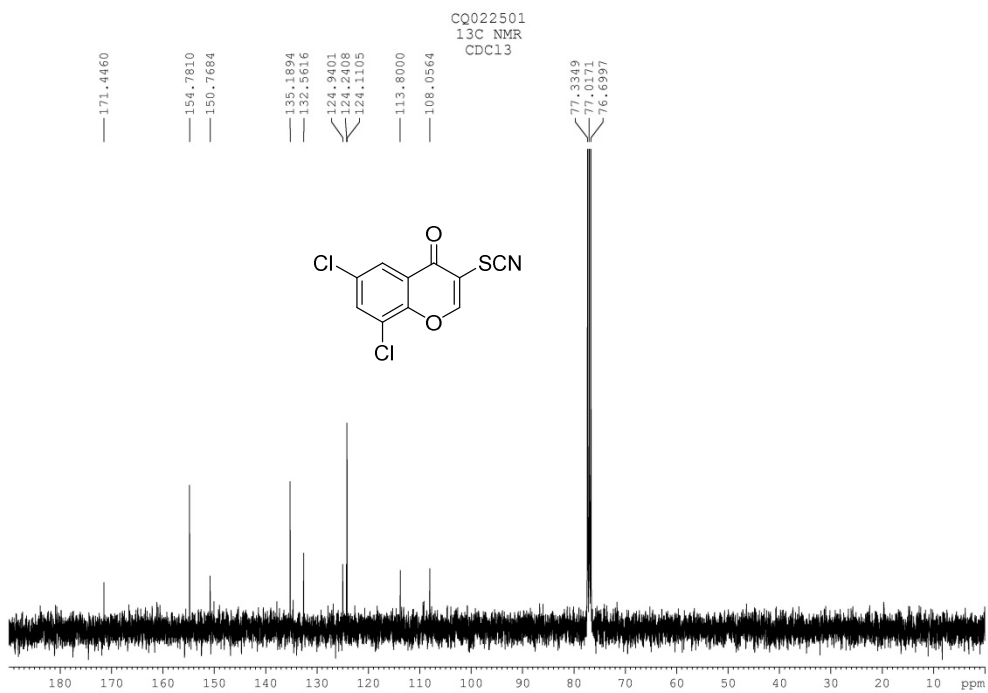

Fig. 79  $^{13}\text{C}$  NMR spectrum of compound 5j

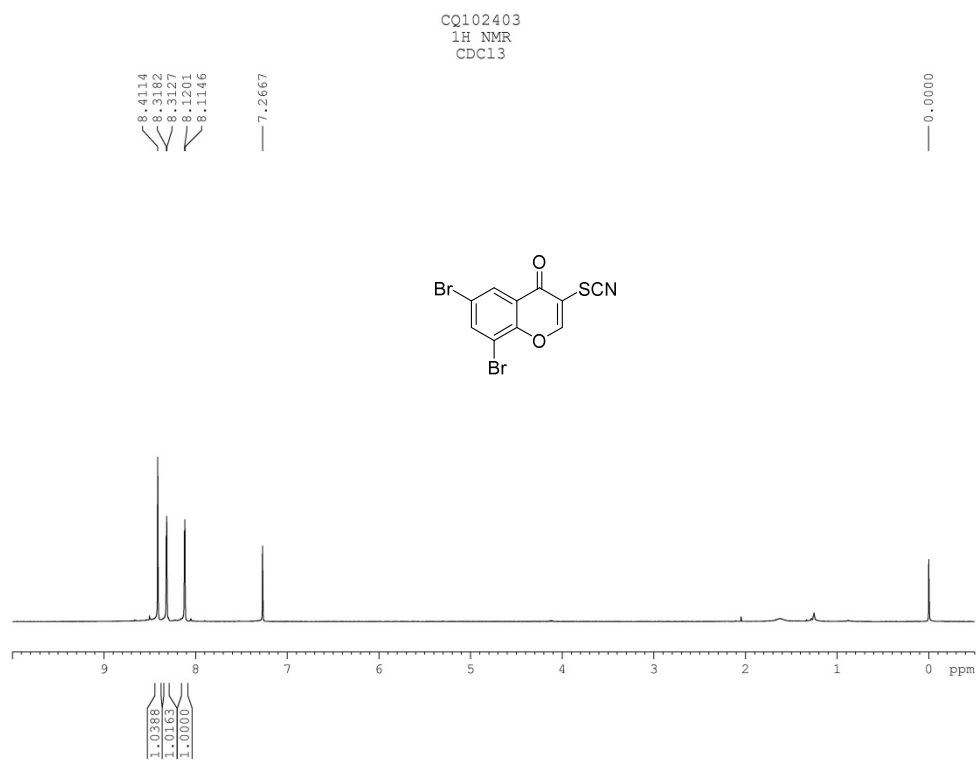

Fig. 80  $^1\text{H}$  NMR spectrum of compound 5k

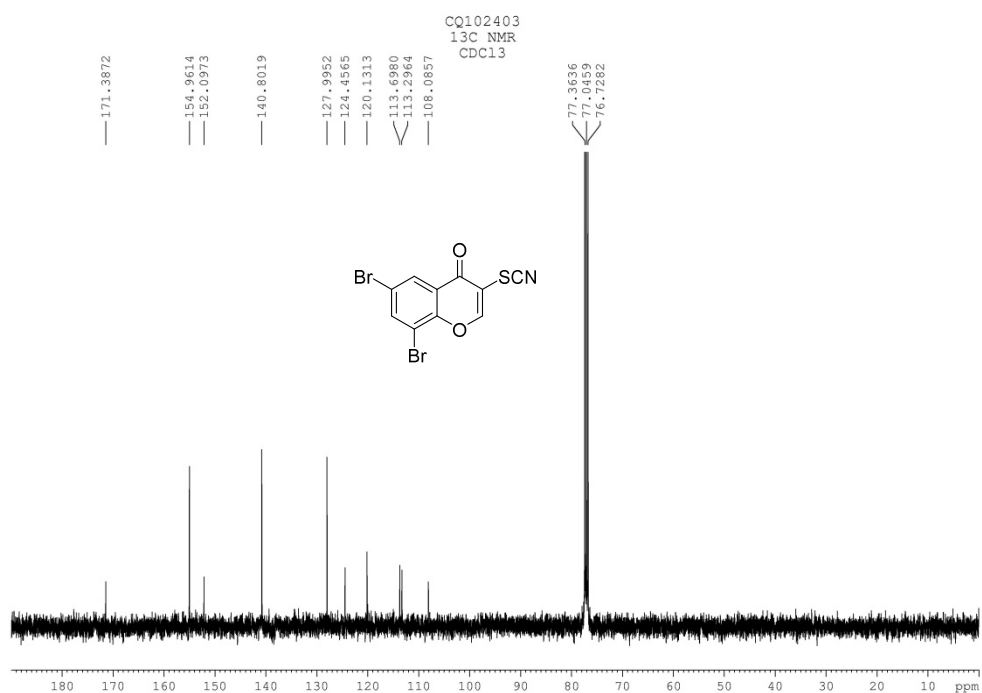

Fig. 81 <sup>13</sup>C NMR spectrum of compound 5k

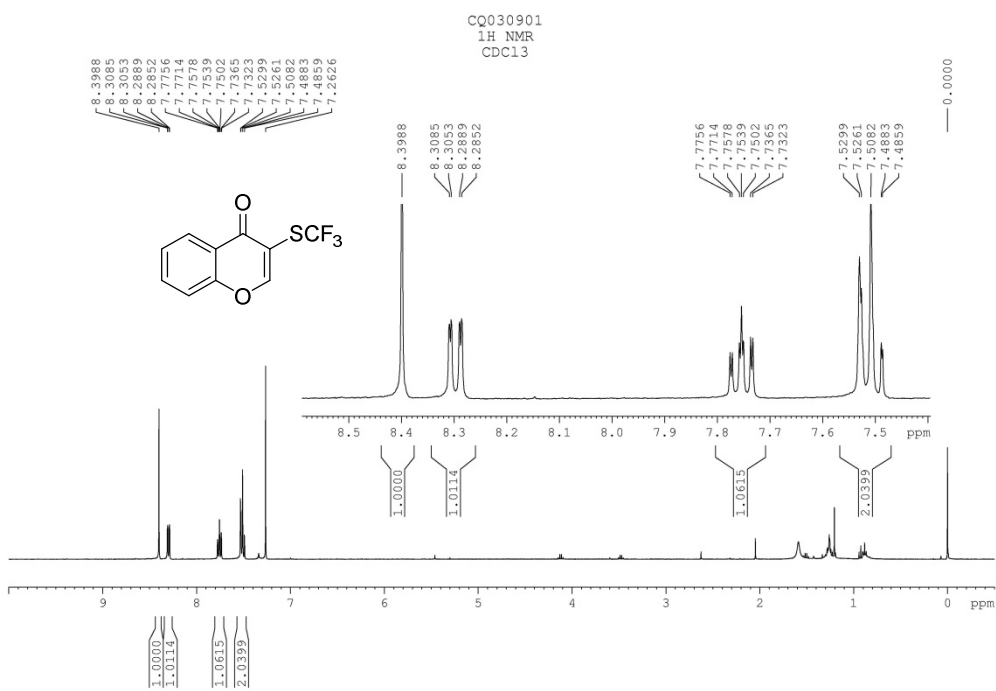

Fig. 82 <sup>1</sup>H NMR spectrum of compound 6a

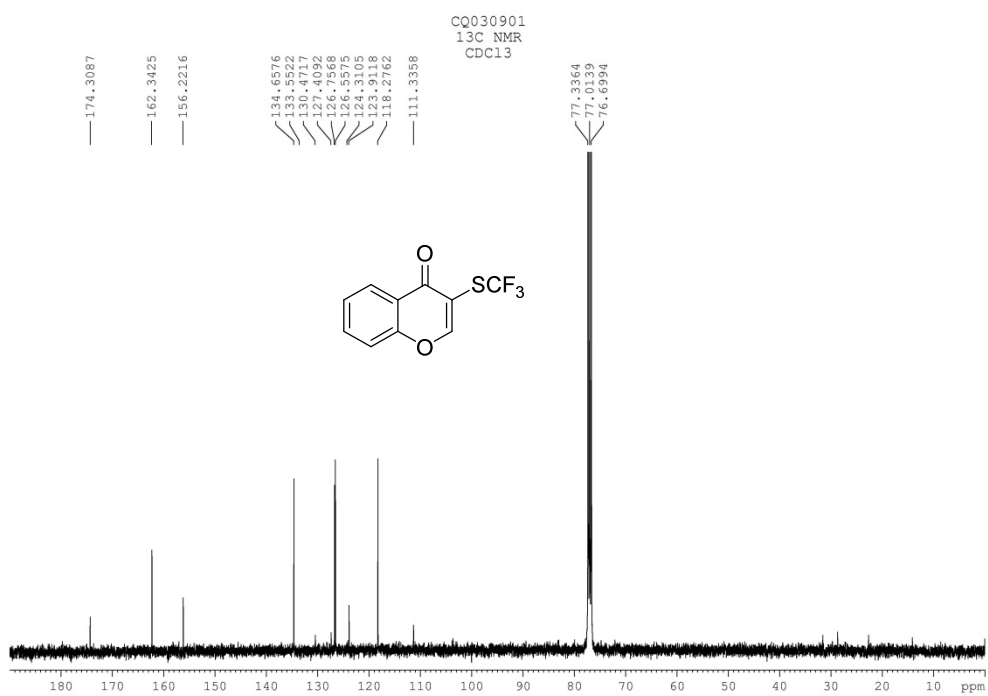

**Fig. 83** <sup>13</sup>C NMR spectrum of compound **6a**

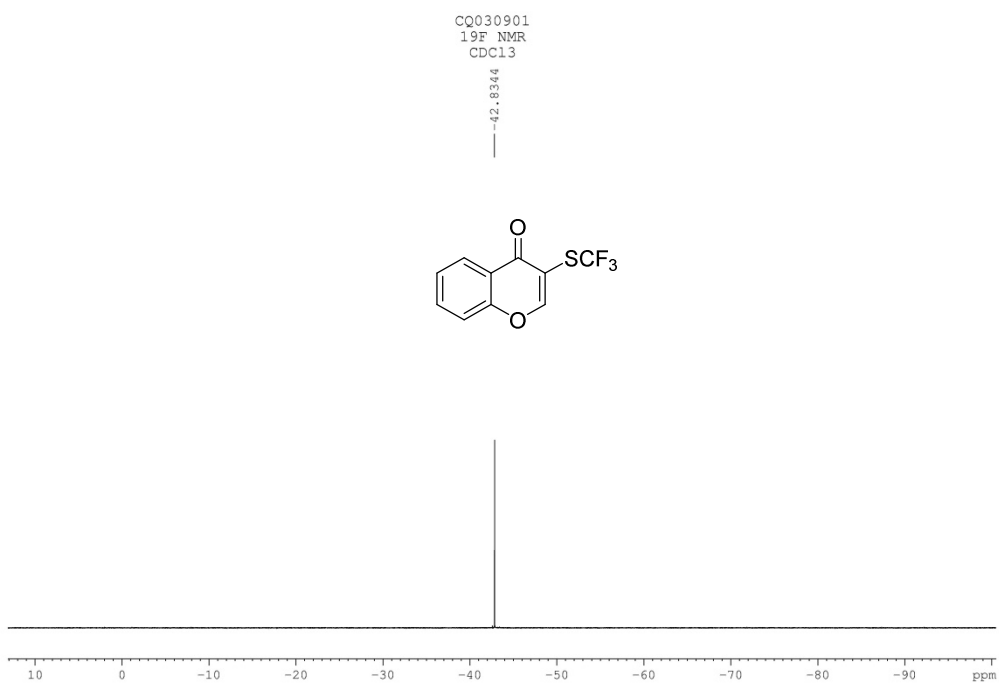

**Fig. 84** <sup>19</sup>F NMR spectrum of compound **6a**
